# Supplementary material
Source: publisher site journal article supplement (https://www.spandidos-publications.com/4246/downloadSupplementary)
Supplement: Supplementary file 1 [file downloadSupplementary]

## Sheet: Sheet1
Table SIII. Differentially expressed lncRNAs resulting from relapse vs. non-relapse on different subtype comparison in the articles which met inclusion criteria.
lncRNA	Ensembl codea	Expression	Comparison	Reference
TCONS_00017955	ENSG00000165733	up	Early relapse vs. Non-early relapse	Bárcenas-López et al.,2020 (19)
TCONS_00012197	ENSG00000112210	up	Early relapse vs. Non-early relapse	Bárcenas-López et al.,2020
TCONS_00001651	ENSG00000188610	up	Early relapse vs. Non-early relapse	Bárcenas-López et al.,2020
LINC00152	ENSG00000222041	up	Early relapse vs. Non-early relapse	Bárcenas-López et al.,2020
TCONS_00003765	ENSG00000163060	up	Early relapse vs. Non-early relapse	Bárcenas-López et al.,2020
RP11-417J8.3		up	Early relapse vs. Non-early relapse	Bárcenas-López et al.,2020
RP11-782C8.2		up	Early relapse vs. Non-early relapse	Bárcenas-López et al.,2020
MIR4435-2HG	ENSG00000172965	up	Early relapse vs. Non-early relapse	Bárcenas-López et al.,2020
TCONS_00026334		up	Early relapse vs. Non-early relapse	Bárcenas-López et al.,2020
DYX1C1-CCPG1	ENSG00000256061	up	Early relapse vs. Non-early relapse	Bárcenas-López et al.,2020
LINC01806	ENSG00000227403	up	Early relapse vs. Non-early relapse	Bárcenas-López et al.,2020
TCONS_l2_00014790	ENSG00000104267	up	Early relapse vs. Non-early relapse	Bárcenas-López et al.,2020
RP11-353N4.8		up	Early relapse vs. Non-early relapse	Bárcenas-López et al.,2020
AC092580.4	ENSG00000287119	up	Early relapse vs. Non-early relapse	Bárcenas-López et al.,2020
TCONS_00002811	ENSG00000235576	up	Early relapse vs. Non-early relapse	Bárcenas-López et al.,2020
GS1-115G20.1	ENSG00000198860	up	Early relapse vs. Non-early relapse	Bárcenas-López et al.,2020
TCONS_I2_00000382	ENSG00000082512	up	Early relapse vs. Non-early relapse	Bárcenas-López et al.,2020
LINC00282	ENSG00000281106	up	Early relapse vs. Non-early relapse	Bárcenas-López et al.,2020
LINC00623	ENSG00000226067	up	Early relapse vs. Non-early relapse	Bárcenas-López et al.,2020
TCONS_I2_00019376		up	Early relapse vs. Non-early relapse	Bárcenas-López et al.,2020
RP11-518L10.5	ENSG00000035687	up	Early relapse vs. Non-early relapse	Bárcenas-López et al.,2020
CTD-2530H12.2	ENSG00000198382	up	Early relapse vs. Non-early relapse	Bárcenas-López et al.,2020
TCONS_00018335	ENSG00000150594	up	Early relapse vs. Non-early relapse	Bárcenas-López et al.,2020
RP11-1143G9.4	ENSG00000198812	up	Early relapse vs. Non-early relapse	Bárcenas-López et al.,2020
EMCN-IT1	ENSG00000251636	up	Early relapse vs. Non-early relapse	Bárcenas-López et al.,2020
AC079630.4	ENSG00000151229	up	Early relapse vs. Non-early relapse	Bárcenas-López et al.,2020
RP11-531H8.1	ENSG00000188487	up	Early relapse vs. Non-early relapse	Bárcenas-López et al.,2020
TCONS_00002890	ENSG00000116062	down	Early relapse vs. Non-early relapse	Bárcenas-López et al.,2020
TCONS_00014502	ENSG00000104415	down	Early relapse vs. Non-early relapse	Bárcenas-López et al.,2020
TRAF3IP2-AS1	ENSG00000231889	down	Early relapse vs. Non-early relapse	Bárcenas-López et al.,2020
AC093818.1	ENSG00000115844	down	Early relapse vs. Non-early relapse	Bárcenas-López et al.,2020
LINC01590	ENSG00000111850	down	Early relapse vs. Non-early relapse	Bárcenas-López et al.,2020
LOC145783	ENSG00000137871	down	Early relapse vs. Non-early relapse	Bárcenas-López et al.,2020
RAB30-AS1	ENSG00000246067	down	Early relapse vs. Non-early relapse	Bárcenas-López et al.,2020
TCONS_l2_00012404		down	Early relapse vs. Non-early relapse	Bárcenas-López et al.,2020
LOC101929709	ENSG00000104320	down	Early relapse vs. Non-early relapse	Bárcenas-López et al.,2020
CTD-2363C16.1	ENSG00000164332	down	Early relapse vs. Non-early relapse	Bárcenas-López et al.,2020
TCONS_I2_00017131		down	Early relapse vs. Non-early relapse	Bárcenas-López et al.,2020
ARSD-AS1	ENSG00000229851	down	Early relapse vs. Non-early relapse	Bárcenas-López et al.,2020
LINC01237	ENSG00000233806	down	Early relapse vs. Non-early relapse	Bárcenas-López et al.,2020
TCONS_00013117	ENSG00000146535	down	Early relapse vs. Non-early relapse	Bárcenas-López et al.,2020
GABPB1-AS1	ENSG00000244879	down	Early relapse vs. Non-early relapse	Bárcenas-López et al.,2020
TCONS_l2_00012389	ENSG00000250903	down	Early relapse vs. Non-early relapse	Bárcenas-López et al.,2020
LOC105377134		down	Early relapse vs. Non-early relapse	Bárcenas-López et al.,2020
LOC100505549		down	Early relapse vs. Non-early relapse	Bárcenas-López et al.,2020
RP11-69I8.3		down	Early relapse vs. Non-early relapse	Bárcenas-López et al.,2020
CDKN2B-AS1	ENSG00000240498	down	Early relapse vs. Non-early relapse	Bárcenas-López et al.,2020
RP5-1031D4.2	ENSG00000198879	down	Early relapse vs. Non-early relapse	Bárcenas-López et al.,2020
AC131097.3	ENSG00000235151	down	Early relapse vs. Non-early relapse	Bárcenas-López et al.,2020
RP11-52J3.3	ENSG00000122335	down	Early relapse vs. Non-early relapse	Bárcenas-López et al.,2020
RP11-430C7.5	ENSG00000198625	down	Early relapse vs. Non-early relapse	Bárcenas-López et al.,2020
LINC00341	ENSG00000176438	down	Early relapse vs. Non-early relapse	Bárcenas-López et al.,2020
FLJ10038	ENSG00000285410	down	Early relapse vs. Non-early relapse	Bárcenas-López et al.,2020
LOC100130476	ENSG00000237499	down	Early relapse vs. Non-early relapse	Bárcenas-López et al.,2020
CTB-57H20.1	ENSG00000158497	down	Early relapse vs. Non-early relapse	Bárcenas-López et al.,2020
ARPP21-AS1	ENSG00000230830	down	Early relapse vs. Non-early relapse	Bárcenas-López et al.,2020
LINC01013	ENSG00000228495	down	Early relapse vs. Non-early relapse	Bárcenas-López et al.,2020
TCONS_00017956		up	Dead on first 24 moths vs. Alive after first 24 moths	Bárcenas-López et al.,2020
TCONS_00001651		up	Dead on first 24 moths vs. Alive after first 24 moths	Bárcenas-López et al.,2020
LOC101927497		up	Dead on first 24 moths vs. Alive after first 24 moths	Bárcenas-López et al.,2020
RP11-124N14.3		up	Dead on first 24 moths vs. Alive after first 24 moths	Bárcenas-López et al.,2020
CTC-564N23.2		up	Dead on first 24 moths vs. Alive after first 24 moths	Bárcenas-López et al.,2020
LINC00152	ENSG00000222041	up	Dead on first 24 moths vs. Alive after first 24 moths	Bárcenas-López et al.,2020
TCONS_00003765	ENSG00000163060	up	Dead on first 24 moths vs. Alive after first 24 moths	Bárcenas-López et al.,2020
TCONS_l2_00017775	ENSG00000198610	up	Dead on first 24 moths vs. Alive after first 24 moths	Bárcenas-López et al.,2020
LOC100506844	ENSG00000175215	up	Dead on first 24 moths vs. Alive after first 24 moths	Bárcenas-López et al.,2020
CTB-131B5.2	ENSG00000182700	up	Dead on first 24 moths vs. Alive after first 24 moths	Bárcenas-López et al.,2020
AC012322.1	ENSG00000261028	up	Dead on first 24 moths vs. Alive after first 24 moths	Bárcenas-López et al.,2020
AC016995.3		up	Dead on first 24 moths vs. Alive after first 24 moths	Bárcenas-López et al.,2020
RP6-206I17.1		up	Dead on first 24 moths vs. Alive after first 24 moths	Bárcenas-López et al.,2020
AC017002.2	ENSG00000280878	up	Dead on first 24 moths vs. Alive after first 24 moths	Bárcenas-López et al.,2020
TCONS_l2_00012696		up	Dead on first 24 moths vs. Alive after first 24 moths	Bárcenas-López et al.,2020
TCONS_l2_00005705		up	Dead on first 24 moths vs. Alive after first 24 moths	Bárcenas-López et al.,2020
USP30-AS1	ENSG00000256262	up	Dead on first 24 moths vs. Alive after first 24 moths	Bárcenas-López et al.,2020
TCONS_l2_00013175		up	Dead on first 24 moths vs. Alive after first 24 moths	Bárcenas-López et al.,2020
MIR4435-2HG	ENSG00000172965	up	Dead on first 24 moths vs. Alive after first 24 moths	Bárcenas-López et al.,2020
LOC100996579	ENSG00000227403	up	Dead on first 24 moths vs. Alive after first 24 moths	Bárcenas-López et al.,2020
TCONS_00029192	ENSG00000273590	up	Dead on first 24 moths vs. Alive after first 24 moths	Bárcenas-López et al.,2020
TCONS_00004538	ENSG00000168497	up	Dead on first 24 moths vs. Alive after first 24 moths	Bárcenas-López et al.,2020
TCONS_00022867	ENSG00000127152	up	Dead on first 24 moths vs. Alive after first 24 moths	Bárcenas-López et al.,2020
RP4-666F24.3	ENSG00000233730	up	Dead on first 24 moths vs. Alive after first 24 moths	Bárcenas-López et al.,2020
RP11-839G9.1	ENSG00000166510	up	Dead on first 24 moths vs. Alive after first 24 moths	Bárcenas-López et al.,2020
RP11-403I13.4	ENSG00000279782	up	Dead on first 24 moths vs. Alive after first 24 moths	Bárcenas-López et al.,2020
LOC101928307	ENSG00000168216	up	Dead on first 24 moths vs. Alive after first 24 moths	Bárcenas-López et al.,2020
LOC90246	ENSG00000244300	up	Dead on first 24 moths vs. Alive after first 24 moths	Bárcenas-López et al.,2020
LOC101927059	ENSG00000251542	down	Dead on first 24 moths vs. Alive after first 24 moths	Bárcenas-López et al.,2020
LOC100131497		down	Dead on first 24 moths vs. Alive after first 24 moths	Bárcenas-López et al.,2020
EPN2-IT1	ENSG00000072134	down	Dead on first 24 moths vs. Alive after first 24 moths	Bárcenas-López et al.,2020
CHL1-AS1	ENSG00000234661	down	Dead on first 24 moths vs. Alive after first 24 moths	Bárcenas-López et al.,2020
LOC101927516		down	Dead on first 24 moths vs. Alive after first 24 moths	Bárcenas-López et al.,2020
LOC105375448		down	Dead on first 24 moths vs. Alive after first 24 moths	Bárcenas-López et al.,2020
LOC102724596	ENSG00000064300	down	Dead on first 24 moths vs. Alive after first 24 moths	Bárcenas-López et al.,2020
LOC100507387	ENSG00000182230	down	Dead on first 24 moths vs. Alive after first 24 moths	Bárcenas-López et al.,2020
LOC101927606	ENSG00000259779	down	Dead on first 24 moths vs. Alive after first 24 moths	Bárcenas-López et al.,2020
LINC01558	ENSG00000146521	down	Dead on first 24 moths vs. Alive after first 24 moths	Bárcenas-López et al.,2020
LINC01375	ENSG00000226159	down	Dead on first 24 moths vs. Alive after first 24 moths	Bárcenas-López et al.,2020
LOC101927138		down	Dead on first 24 moths vs. Alive after first 24 moths	Bárcenas-López et al.,2020
LOC285766	ENSG00000263667	down	Dead on first 24 moths vs. Alive after first 24 moths	Bárcenas-López et al.,2020
LOC93622		down	Dead on first 24 moths vs. Alive after first 24 moths	Bárcenas-López et al.,2020
LOC101929524	ENSG00000246214	down	Dead on first 24 moths vs. Alive after first 24 moths	Bárcenas-López et al.,2020
TRAF3IP2-AS1	ENSG00000231889	down	Dead on first 24 moths vs. Alive after first 24 moths	Bárcenas-López et al.,2020
LINC00243	ENSG00000214894	down	Dead on first 24 moths vs. Alive after first 24 moths	Bárcenas-López et al.,2020
LINC01590	ENSG00000111850	down	Dead on first 24 moths vs. Alive after first 24 moths	Bárcenas-López et al.,2020
RP5-1018A4.3	ENSG00000118482	down	Dead on first 24 moths vs. Alive after first 24 moths	Bárcenas-López et al.,2020
AC009950.1	ENSG00000225963	down	Dead on first 24 moths vs. Alive after first 24 moths	Bárcenas-López et al.,2020
LOC101930370	ENSG00000164104	down	Dead on first 24 moths vs. Alive after first 24 moths	Bárcenas-López et al.,2020
LINC01237	ENSG00000233806	down	Dead on first 24 moths vs. Alive after first 24 moths	Bárcenas-López et al.,2020
LOC283454		down	Dead on first 24 moths vs. Alive after first 24 moths	Bárcenas-López et al.,2020
LOC283299	ENSG00000166394	down	Dead on first 24 moths vs. Alive after first 24 moths	Bárcenas-López et al.,2020
PSMB8-AS1	ENSG00000204261	down	Dead on first 24 moths vs. Alive after first 24 moths	Bárcenas-López et al.,2020
GABPB1-AS1	ENSG00000244879	down	Dead on first 24 moths vs. Alive after first 24 moths	Bárcenas-López et al.,2020
LINC01184	ENSG00000245937	down	Dead on first 24 moths vs. Alive after first 24 moths	Bárcenas-López et al.,2020
LOC101929709	ENSG00000104320	down	Dead on first 24 moths vs. Alive after first 24 moths	Bárcenas-López et al.,2020
LOC100505549		down	Dead on first 24 moths vs. Alive after first 24 moths	Bárcenas-López et al.,2020
LOC105377134		down	Dead on first 24 moths vs. Alive after first 24 moths	Bárcenas-López et al.,2020
LOC101927502	ENSG00000189357	down	Dead on first 24 moths vs. Alive after first 24 moths	Bárcenas-López et al.,2020
LOC101928324	ENSG00000176083	down	Dead on first 24 moths vs. Alive after first 24 moths	Bárcenas-López et al.,2020
LINC00544	ENSG00000122043	down	Dead on first 24 moths vs. Alive after first 24 moths	Bárcenas-López et al.,2020
TCONS_00013502	ENSG00000243566	down	Dead on first 24 moths vs. Alive after first 24 moths	Bárcenas-López et al.,2020
CTC-457E21.9	ENSG00000213973	down	Dead on first 24 moths vs. Alive after first 24 moths	Bárcenas-López et al.,2020
LOC100132686		down	Dead on first 24 moths vs. Alive after first 24 moths	Bárcenas-López et al.,2020
RP11-69I8.3		down	Dead on first 24 moths vs. Alive after first 24 moths	Bárcenas-López et al.,2020
BZRAP1-AS1	ENSG00000265148	down	Dead on first 24 moths vs. Alive after first 24 moths	Bárcenas-López et al.,2020
RP11-430C7.5	ENSG00000198625	down	Dead on first 24 moths vs. Alive after first 24 moths	Bárcenas-López et al.,2020
RP11-20D14.3	ENSG00000166532	down	Dead on first 24 moths vs. Alive after first 24 moths	Bárcenas-López et al.,2020
LOC285097		down	Dead on first 24 moths vs. Alive after first 24 moths	Bárcenas-López et al.,2020
HLA-DQB1-AS1	ENSG00000223534	down	Dead on first 24 moths vs. Alive after first 24 moths	Bárcenas-López et al.,2020
P4HA2-AS1	ENSG00000237714	down	Dead on first 24 moths vs. Alive after first 24 moths	Bárcenas-López et al.,2020
RP5-1031D4.2	ENSG00000198879	down	Dead on first 24 moths vs. Alive after first 24 moths	Bárcenas-López et al.,2020
CTC-265F19.1	ENSG00000176490	down	Dead on first 24 moths vs. Alive after first 24 moths	Bárcenas-López et al.,2020
TCONS_00017392	ENSG00000196433	down	Dead on first 24 moths vs. Alive after first 24 moths	Bárcenas-López et al.,2020
LOC101926967		down	Dead on first 24 moths vs. Alive after first 24 moths	Bárcenas-López et al.,2020
RP11-15F12.1	ENSG00000134030	down	Dead on first 24 moths vs. Alive after first 24 moths	Bárcenas-López et al.,2020
AC123023.1	ENSG00000226320	down	Dead on first 24 moths vs. Alive after first 24 moths	Bárcenas-López et al.,2020
RP11-83A24.2	ENSG00000145391	down	Dead on first 24 moths vs. Alive after first 24 moths	Bárcenas-López et al.,2020
AC131097.3	ENSG00000235151	down	Dead on first 24 moths vs. Alive after first 24 moths	Bárcenas-López et al.,2020
TCONS_00020756	ENSG00000255760	down	Dead on first 24 moths vs. Alive after first 24 moths	Bárcenas-López et al.,2020
RP11-421E14.2	ENSG00000008294	down	Dead on first 24 moths vs. Alive after first 24 moths	Bárcenas-López et al.,2020
CTD-2031P19.5		down	Dead on first 24 moths vs. Alive after first 24 moths	Bárcenas-López et al.,2020
LINC00854	ENSG00000236383	down	Dead on first 24 moths vs. Alive after first 24 moths	Bárcenas-López et al.,2020
LOC101927849	ENSG00000248210	down	Dead on first 24 moths vs. Alive after first 24 moths	Bárcenas-López et al.,2020
TCONS_l2_00022830	ENSG00000100433	down	Dead on first 24 moths vs. Alive after first 24 moths	Bárcenas-López et al.,2020
RP11-136K14.2	ENSG00000009765	down	Dead on first 24 moths vs. Alive after first 24 moths	Bárcenas-López et al.,2020
TCONS_00017125	ENSG00000196433	down	Dead on first 24 moths vs. Alive after first 24 moths	Bárcenas-López et al.,2020
RP11-542A14.1	ENSG00000155858	down	Dead on first 24 moths vs. Alive after first 24 moths	Bárcenas-López et al.,2020
TCONS_00014020	ENSG00000146910	down	Dead on first 24 moths vs. Alive after first 24 moths	Bárcenas-López et al.,2020
TCONS_l2_00011557		down	Dead on first 24 moths vs. Alive after first 24 moths	Bárcenas-López et al.,2020
PART1	ENSG00000152931	down	Dead on first 24 moths vs. Alive after first 24 moths	Bárcenas-López et al.,2020
AC093642.3	ENSG00000237940	down	Dead on first 24 moths vs. Alive after first 24 moths	Bárcenas-López et al.,2020
RP11-52J3.3	ENSG00000122335	down	Dead on first 24 moths vs. Alive after first 24 moths	Bárcenas-López et al.,2020
TCONS_00017391	ENSG00000277150	down	Dead on first 24 moths vs. Alive after first 24 moths	Bárcenas-López et al.,2020
TCONS_00018278	ENSG00000280560	down	Dead on first 24 moths vs. Alive after first 24 moths	Bárcenas-López et al.,2020
RP11-172E10.1	ENSG00000164687	down	Dead on first 24 moths vs. Alive after first 24 moths	Bárcenas-López et al.,2020
LOC102723883	ENSG00000135298	down	Dead on first 24 moths vs. Alive after first 24 moths	Bárcenas-López et al.,2020
LOC100507516		down	Dead on first 24 moths vs. Alive after first 24 moths	Bárcenas-López et al.,2020
TCONS_00011939	ENSG00000111875	down	Dead on first 24 moths vs. Alive after first 24 moths	Bárcenas-López et al.,2020
AP001056.1	ENSG00000241945	down	Dead on first 24 moths vs. Alive after first 24 moths	Bárcenas-López et al.,2020
TCONS_00018281	ENSG00000138182	down	Dead on first 24 moths vs. Alive after first 24 moths	Bárcenas-López et al.,2020
TAPT1-AS1	ENSG00000263327	down	Dead on first 24 moths vs. Alive after first 24 moths	Bárcenas-López et al.,2020
LOC105375844		down	Dead on first 24 moths vs. Alive after first 24 moths	Bárcenas-López et al.,2020
LOC102723927	ENSG00000237940	down	Dead on first 24 moths vs. Alive after first 24 moths	Bárcenas-López et al.,2020
RP11-582J16.4	ENSG00000147439	down	Dead on first 24 moths vs. Alive after first 24 moths	Bárcenas-López et al.,2020
LOC100130476	ENSG00000237499	down	Dead on first 24 moths vs. Alive after first 24 moths	Bárcenas-López et al.,2020
RP11-53B2.3	ENSG00000177150	down	Dead on first 24 moths vs. Alive after first 24 moths	Bárcenas-López et al.,2020
RP11-68I3.11	ENSG00000167549	down	Dead on first 24 moths vs. Alive after first 24 moths	Bárcenas-López et al.,2020
RP3-523C21.2	ENSG00000197594	down	Dead on first 24 moths vs. Alive after first 24 moths	Bárcenas-López et al.,2020
LINC00341	ENSG00000176438	down	Dead on first 24 moths vs. Alive after first 24 moths	Bárcenas-López et al.,2020
TCONS_00008287	ENSG00000071205	down	Dead on first 24 moths vs. Alive after first 24 moths	Bárcenas-López et al.,2020
CTA-250D10.23	ENSG00000159958	down	Dead on first 24 moths vs. Alive after first 24 moths	Bárcenas-López et al.,2020
TCONS_00025471	ENSG00000196704	down	Dead on first 24 moths vs. Alive after first 24 moths	Bárcenas-López et al.,2020
RP11-428G5.5	ENSG00000255760	down	Dead on first 24 moths vs. Alive after first 24 moths	Bárcenas-López et al.,2020
CTC-436K13.3	ENSG00000155858	down	Dead on first 24 moths vs. Alive after first 24 moths	Bárcenas-López et al.,2020
LOC101927902		down	Dead on first 24 moths vs. Alive after first 24 moths	Bárcenas-López et al.,2020
LARGE-IT1	ENSG00000232081	down	Dead on first 24 moths vs. Alive after first 24 moths	Bárcenas-López et al.,2020
RP11-1149M10.2	ENSG00000164687	down	Dead on first 24 moths vs. Alive after first 24 moths	Bárcenas-López et al.,2020
RP11-136K14.1	ENSG00000009765	down	Dead on first 24 moths vs. Alive after first 24 moths	Bárcenas-López et al.,2020
ARPP21-AS1	ENSG00000230830	down	Dead on first 24 moths vs. Alive after first 24 moths	Bárcenas-López et al.,2020
TCONS_00014938	ENSG00000038945	down	Dead on first 24 moths vs. Alive after first 24 moths	Bárcenas-López et al.,2020
CTB-57H20.1	ENSG00000158497	down	Dead on first 24 moths vs. Alive after first 24 moths	Bárcenas-López et al.,2020
LINC01013	ENSG00000228495	down	Dead on first 24 moths vs. Alive after first 24 moths	Bárcenas-López et al.,2020
CTC-436K13.2	ENSG00000155858	down	Dead on first 24 moths vs. Alive after first 24 moths	Bárcenas-López et al.,2020
BALR-2 (CDK6-AS1)	ENSG00000237819	up	Worst overall survival	Fernando et al. 2015 (33)
AC006378.2	ENSG00000236861	up	Relapsed vs. Non-relapsed DUX4 patients	James et al. 2019 (36)
RP11-66N24.4	ENSG00000157306	up	Relapsed vs. Non-relapsed DUX4 patients	James et al. 2019
AC068039.4	ENSG00000228389	up	Relapsed vs. Non-relapsed DUX4 patients	James et al. 2019
OSER1-AS1	ENSG00000223891	up	Relapsed vs. Non-relapsed DUX4 patients	James et al. 2019
RP11-109D20.1	ENSG00000259418	up	Relapsed vs. Non-relapsed DUX4 patients	James et al. 2019
RP11-932O9.7	ENSG00000247728	up	Relapsed vs. Non-relapsed DUX4 patients	James et al. 2019
RP11-531A24.5	ENSG00000253636	up	Relapsed vs. Non-relapsed DUX4 patients	James et al. 2019
ALG13-AS1	ENSG00000229487	up	Relapsed vs. Non-relapsed DUX4 patients	James et al. 2019
AP001056.1	ENSG00000237604	up	Relapsed vs. Non-relapsed DUX4 patients	James et al. 2019
RP11-383C5.5	ENSG00000234134	up	Relapsed vs. Non-relapsed DUX4 patients	James et al. 2019
RP11-703M24.5	ENSG00000266049	up	Relapsed vs. Non-relapsed DUX4 patients	James et al. 2019
LA16c-306A4.1	ENSG00000260022	up	Relapsed vs. Non-relapsed DUX4 patients	James et al. 2019
RP11-402G3.5	ENSG00000230054	up	Relapsed vs. Non-relapsed DUX4 patients	James et al. 2019
CTC-248O19.1	ENSG00000253653	up	Relapsed vs. Non-relapsed DUX4 patients	James et al. 2019
SOCS2-AS1	ENSG00000246985	up	Relapsed vs. Non-relapsed DUX4 patients	James et al. 2019
LINC00342	ENSG00000232931	up	Relapsed vs. Non-relapsed DUX4 patients	James et al. 2019
ZBED3-AS1	ENSG00000250802	up	Relapsed vs. Non-relapsed DUX4 patients	James et al. 2019
RP11-977G19.12	ENSG00000257740	up	Relapsed vs. Non-relapsed DUX4 patients	James et al. 2019
RP11-960L18.1	ENSG00000261218	up	Relapsed vs. Non-relapsed DUX4 patients	James et al. 2019
CCDC183-AS1	ENSG00000228544	up	Relapsed vs. Non-relapsed DUX4 patients	James et al. 2019
RP11-575L7.2	ENSG00000226877	up	Relapsed vs. Non-relapsed DUX4 patients	James et al. 2019
RP4-647C14.3	ENSG00000258944	up	Relapsed vs. Non-relapsed DUX4 patients	James et al. 2019
RP11-165M1.2	ENSG00000260723	up	Relapsed vs. Non-relapsed DUX4 patients	James et al. 2019
RP11-692D12.1	ENSG00000250220	up	Relapsed vs. Non-relapsed DUX4 patients	James et al. 2019
RP5-1077I2.3	ENSG00000225956	up	Relapsed vs. Non-relapsed DUX4 patients	James et al. 2019
PRRT3-AS1	ENSG00000230082	up	Relapsed vs. Non-relapsed DUX4 patients	James et al. 2019
RP11-190D6.2	ENSG00000260969	up	Relapsed vs. Non-relapsed DUX4 patients	James et al. 2019
RP5-886K2.3	ENSG00000236810	up	Relapsed vs. Non-relapsed DUX4 patients	James et al. 2019
AC007228.11	ENSG00000269696	up	Relapsed vs. Non-relapsed DUX4 patients	James et al. 2019
CTD-3193O13.13	ENSG00000268149	up	Relapsed vs. Non-relapsed DUX4 patients	James et al. 2019
RP11-452H21.2	ENSG00000254649	up	Relapsed vs. Non-relapsed DUX4 patients	James et al. 2019
AC004840.9	ENSG00000175873	up	Relapsed vs. Non-relapsed DUX4 patients	James et al. 2019
RP11-218M22.1	ENSG00000177406	up	Relapsed vs. Non-relapsed DUX4 patients	James et al. 2019
SEC24B-AS1	ENSG00000247950	up	Relapsed vs. Non-relapsed DUX4 patients	James et al. 2019
AC091729.9	ENSG00000229043	up	Relapsed vs. Non-relapsed DUX4 patients	James et al. 2019
RP11-326C3.11	ENSG00000251661	up	Relapsed vs. Non-relapsed DUX4 patients	James et al. 2019
LINC00865	ENSG00000232229	up	Relapsed vs. Non-relapsed DUX4 patients	James et al. 2019
RP11-803B1.8	ENSG00000272690	up	Relapsed vs. Non-relapsed DUX4 patients	James et al. 2019
RP11-338O1.2	ENSG00000225152	up	Relapsed vs. Non-relapsed DUX4 patients	James et al. 2019
RP1-93H18.1	ENSG00000240050	up	Relapsed vs. Non-relapsed DUX4 patients	James et al. 2019
ZNF582-AS1	ENSG00000267454	up	Relapsed vs. Non-relapsed DUX4 patients	James et al. 2019
AC022182.1	ENSG00000254777	up	Relapsed vs. Non-relapsed DUX4 patients	James et al. 2019
RP11-383D22.1	ENSG00000267146	up	Relapsed vs. Non-relapsed DUX4 patients	James et al. 2019
UGDH-AS1	ENSG00000249348	up	Relapsed vs. Non-relapsed DUX4 patients	James et al. 2019
AC098820.3	ENSG00000232485	up	Relapsed vs. Non-relapsed DUX4 patients	James et al. 2019
RP11-506M12.1	ENSG00000242798	up	Relapsed vs. Non-relapsed DUX4 patients	James et al. 2019
IQCH-AS1	ENSG00000259673	up	Relapsed vs. Non-relapsed DUX4 patients	James et al. 2019
RP11-505E24.3	ENSG00000259376	up	Relapsed vs. Non-relapsed DUX4 patients	James et al. 2019
RP11-848P1.3	ENSG00000265743	up	Relapsed vs. Non-relapsed DUX4 patients	James et al. 2019
RP3-510O8.4	ENSG00000232909	up	Relapsed vs. Non-relapsed DUX4 patients	James et al. 2019
RP11-162G10.5	ENSG00000236514	up	Relapsed vs. Non-relapsed DUX4 patients	James et al. 2019
CKMT2-AS1	ENSG00000247572	up	Relapsed vs. Non-relapsed DUX4 patients	James et al. 2019
DNAJC9-AS1	ENSG00000236756	up	Relapsed vs. Non-relapsed DUX4 patients	James et al. 2019
LINC00161	ENSG00000226935	up	Relapsed vs. Non-relapsed DUX4 patients	James et al. 2019
RP11-701H24.3	ENSG00000257647	up	Relapsed vs. Non-relapsed DUX4 patients	James et al. 2019
RP11-545D19.1	ENSG00000233571	up	Relapsed vs. Non-relapsed DUX4 patients	James et al. 2019
RP11-49K24.4	ENSG00000266957	up	Relapsed vs. Non-relapsed DUX4 patients	James et al. 2019
CTB-30L5.1	ENSG00000267052	up	Relapsed vs. Non-relapsed DUX4 patients	James et al. 2019
RP11-159F24.6	ENSG00000248554	up	Relapsed vs. Non-relapsed DUX4 patients	James et al. 2019
AC007551.3	ENSG00000228878	up	Relapsed vs. Non-relapsed DUX4 patients	James et al. 2019
RP11-318M2.2	ENSG00000247081	up	Relapsed vs. Non-relapsed DUX4 patients	James et al. 2019
RP11-420A23.1	ENSG00000251432	up	Relapsed vs. Non-relapsed DUX4 patients	James et al. 2019
RP11-289F5.1	ENSG00000226798	up	Relapsed vs. Non-relapsed DUX4 patients	James et al. 2019
SSPO	ENSG00000197558	up	Relapsed vs. Non-relapsed DUX4 patients	James et al. 2019
RP11-1079K10.3	ENSG00000248714	up	Relapsed vs. Non-relapsed DUX4 patients	James et al. 2019
CERS6-AS1	ENSG00000227617	up	Relapsed vs. Non-relapsed DUX4 patients	James et al. 2019
RP11-87C12.5	ENSG00000255856	up	Relapsed vs. Non-relapsed DUX4 patients	James et al. 2019
RP11-430C7.4	ENSG00000240710	up	Relapsed vs. Non-relapsed DUX4 patients	James et al. 2019
AC007131.2	ENSG00000233891	up	Relapsed vs. Non-relapsed DUX4 patients	James et al. 2019
RP11-295M18.2	ENSG00000238078	up	Relapsed vs. Non-relapsed DUX4 patients	James et al. 2019
RP11-296A18.3	ENSG00000203356	up	Relapsed vs. Non-relapsed DUX4 patients	James et al. 2019
LENG8-AS1	ENSG00000226696	up	Relapsed vs. Non-relapsed DUX4 patients	James et al. 2019
RBFADN	ENSG00000261126	up	Relapsed vs. Non-relapsed DUX4 patients	James et al. 2019
RP11-428J1.5	ENSG00000272142	up	Relapsed vs. Non-relapsed DUX4 patients	James et al. 2019
RP11-53O19.1	ENSG00000251141	up	Relapsed vs. Non-relapsed DUX4 patients	James et al. 2019
RP11-570L15.1	ENSG00000258268	up	Relapsed vs. Non-relapsed DUX4 patients	James et al. 2019
AC004041.2	ENSG00000223442	up	Relapsed vs. Non-relapsed DUX4 patients	James et al. 2019
RP11-1055B8.4	ENSG00000262877	up	Relapsed vs. Non-relapsed DUX4 patients	James et al. 2019
RP11-65M17.3	ENSG00000254968	up	Relapsed vs. Non-relapsed DUX4 patients	James et al. 2019
CTB-179K24.3	ENSG00000267348	up	Relapsed vs. Non-relapsed DUX4 patients	James et al. 2019
AC104532.4	ENSG00000267571	up	Relapsed vs. Non-relapsed DUX4 patients	James et al. 2019
RP11-617D20.1	ENSG00000231160	up	Relapsed vs. Non-relapsed DUX4 patients	James et al. 2019
LINC00886	ENSG00000240875	up	Relapsed vs. Non-relapsed DUX4 patients	James et al. 2019
RP11-439E19.3	ENSG00000227953	up	Relapsed vs. Non-relapsed DUX4 patients	James et al. 2019
RP11-498M5.2	ENSG00000251309	up	Relapsed vs. Non-relapsed DUX4 patients	James et al. 2019
LINC00471	ENSG00000181798	up	Relapsed vs. Non-relapsed DUX4 patients	James et al. 2019
RP11-431M7.2	ENSG00000251438	up	Relapsed vs. Non-relapsed DUX4 patients	James et al. 2019
LINC00618	ENSG00000225163	up	Relapsed vs. Non-relapsed DUX4 patients	James et al. 2019
RP5-1021I20.1	ENSG00000259065	up	Relapsed vs. Non-relapsed DUX4 patients	James et al. 2019
RP11-390P2.4	ENSG00000225177	up	Relapsed vs. Non-relapsed DUX4 patients	James et al. 2019
XXyac-YX155B6.7	ENSG00000273059	up	Relapsed vs. Non-relapsed DUX4 patients	James et al. 2019
LINC00202-2	ENSG00000231976	up	Relapsed vs. Non-relapsed DUX4 patients	James et al. 2019
CTC-301O7.4	ENSG00000197813	up	Relapsed vs. Non-relapsed DUX4 patients	James et al. 2019
RP11-142C4.6	ENSG00000255240	up	Relapsed vs. Non-relapsed DUX4 patients	James et al. 2019
RP11-115H15.2	ENSG00000258337	up	Relapsed vs. Non-relapsed DUX4 patients	James et al. 2019
CTD-2283N19.1	ENSG00000251330	up	Relapsed vs. Non-relapsed DUX4 patients	James et al. 2019
RP11-298I3.4	ENSG00000258457	up	Relapsed vs. Non-relapsed DUX4 patients	James et al. 2019
CTD-2005H7.1	ENSG00000254731	up	Relapsed vs. Non-relapsed DUX4 patients	James et al. 2019
CTD-2252P21.1	ENSG00000257226	up	Relapsed vs. Non-relapsed DUX4 patients	James et al. 2019
RP11-420B22.1	ENSG00000253335	up	Relapsed vs. Non-relapsed DUX4 patients	James et al. 2019
ZNRD1-AS1	ENSG00000204623	up	Relapsed vs. Non-relapsed DUX4 patients	James et al. 2019
RP11-95G17.2	ENSG00000272472	up	Relapsed vs. Non-relapsed DUX4 patients	James et al. 2019
RP11-406D1.2	ENSG00000255094	up	Relapsed vs. Non-relapsed DUX4 patients	James et al. 2019
RP11-439E19.7	ENSG00000235021	up	Relapsed vs. Non-relapsed DUX4 patients	James et al. 2019
RP11-528G1.2	ENSG00000234425	up	Relapsed vs. Non-relapsed DUX4 patients	James et al. 2019
RP11-342A1.1	ENSG00000250252	up	Relapsed vs. Non-relapsed DUX4 patients	James et al. 2019
AC102953.6	ENSG00000231927	up	Relapsed vs. Non-relapsed DUX4 patients	James et al. 2019
AC020594.5	ENSG00000237133	up	Relapsed vs. Non-relapsed DUX4 patients	James et al. 2019
AC012363.4	ENSG00000224789	up	Relapsed vs. Non-relapsed DUX4 patients	James et al. 2019
RP11-371F15.3	ENSG00000250195	up	Relapsed vs. Non-relapsed DUX4 patients	James et al. 2019
AC018359.1	ENSG00000226320	up	Relapsed vs. Non-relapsed DUX4 patients	James et al. 2019
RP4-535B20.1	ENSG00000231485	up	Relapsed vs. Non-relapsed DUX4 patients	James et al. 2019
RP11-15E18.1	ENSG00000259349	up	Relapsed vs. Non-relapsed DUX4 patients	James et al. 2019
RP11-165F24.5	ENSG00000228115	up	Relapsed vs. Non-relapsed DUX4 patients	James et al. 2019
RP11-967K21.1	ENSG00000247934	up	Relapsed vs. Non-relapsed DUX4 patients	James et al. 2019
TMCC1-AS1	ENSG00000271270	up	Relapsed vs. Non-relapsed DUX4 patients	James et al. 2019
RP11-20G13.1	ENSG00000259341	up	Relapsed vs. Non-relapsed DUX4 patients	James et al. 2019
RP11-1105O14.1	ENSG00000253270	up	Relapsed vs. Non-relapsed DUX4 patients	James et al. 2019
RP11-671P2.1	ENSG00000264263	up	Relapsed vs. Non-relapsed DUX4 patients	James et al. 2019
AC098823.3	ENSG00000226125	up	Relapsed vs. Non-relapsed DUX4 patients	James et al. 2019
RP1-122K4.3	ENSG00000212663	up	Relapsed vs. Non-relapsed DUX4 patients	James et al. 2019
RP11-707G14.7	ENSG00000256360	up	Relapsed vs. Non-relapsed DUX4 patients	James et al. 2019
RP1-63M2.5	ENSG00000271803	up	Relapsed vs. Non-relapsed DUX4 patients	James et al. 2019
CTD-2192J16.21	ENSG00000269560	up	Relapsed vs. Non-relapsed DUX4 patients	James et al. 2019
RP3-510D11.1	ENSG00000228526	up	Relapsed vs. Non-relapsed DUX4 patients	James et al. 2019
RP11-666A8.8	ENSG00000267546	up	Relapsed vs. Non-relapsed DUX4 patients	James et al. 2019
RP11-299M14.2	ENSG00000255343	up	Relapsed vs. Non-relapsed DUX4 patients	James et al. 2019
CTC-344H19.4	ENSG00000268401	up	Relapsed vs. Non-relapsed DUX4 patients	James et al. 2019
RP11-96D24.1	ENSG00000259072	up	Relapsed vs. Non-relapsed DUX4 patients	James et al. 2019
CTB-191K22.6	ENSG00000269392	up	Relapsed vs. Non-relapsed DUX4 patients	James et al. 2019
RP11-383B4.4	ENSG00000225527	up	Relapsed vs. Non-relapsed DUX4 patients	James et al. 2019
RP11-527H14.6	ENSG00000265786	up	Relapsed vs. Non-relapsed DUX4 patients	James et al. 2019
RP11-230L22.4	ENSG00000237336	up	Relapsed vs. Non-relapsed DUX4 patients	James et al. 2019
AC132217.4	ENSG00000240801	up	Relapsed vs. Non-relapsed DUX4 patients	James et al. 2019
RP11-666A8.7	ENSG00000267543	up	Relapsed vs. Non-relapsed DUX4 patients	James et al. 2019
CTB-113P19.3	ENSG00000253921	up	Relapsed vs. Non-relapsed DUX4 patients	James et al. 2019
AC008746.3	ENSG00000227407	up	Relapsed vs. Non-relapsed DUX4 patients	James et al. 2019
RPL34-AS1	ENSG00000234492	up	Relapsed vs. Non-relapsed DUX4 patients	James et al. 2019
RP11-513G11.2	ENSG00000228271	up	Relapsed vs. Non-relapsed DUX4 patients	James et al. 2019
RP4-782L23.2	ENSG00000226883	up	Relapsed vs. Non-relapsed DUX4 patients	James et al. 2019
TOB1-AS1	ENSG00000229980	up	Relapsed vs. Non-relapsed DUX4 patients	James et al. 2019
RP11-1250I15.3	ENSG00000271771	up	Relapsed vs. Non-relapsed DUX4 patients	James et al. 2019
RP11-357N13.1	ENSG00000261049	up	Relapsed vs. Non-relapsed DUX4 patients	James et al. 2019
AC098820.4	ENSG00000241520	up	Relapsed vs. Non-relapsed DUX4 patients	James et al. 2019
APCDD1L-AS1	ENSG00000231290	up	Relapsed vs. Non-relapsed DUX4 patients	James et al. 2019
RP11-356I2.1	ENSG00000234956	up	Relapsed vs. Non-relapsed DUX4 patients	James et al. 2019
RP5-991G20.2	ENSG00000259209	up	Relapsed vs. Non-relapsed DUX4 patients	James et al. 2019
RP11-760H22.2	ENSG00000254343	up	Relapsed vs. Non-relapsed DUX4 patients	James et al. 2019
AC019048.1	ENSG00000223884	up	Relapsed vs. Non-relapsed DUX4 patients	James et al. 2019
RP11-569A11.1	ENSG00000226862	up	Relapsed vs. Non-relapsed DUX4 patients	James et al. 2019
RP11-645N11.3	ENSG00000236226	up	Relapsed vs. Non-relapsed DUX4 patients	James et al. 2019
RP11-266L9.5	ENSG00000262155	up	Relapsed vs. Non-relapsed DUX4 patients	James et al. 2019
RP11-834C11.3	ENSG00000248265	up	Relapsed vs. Non-relapsed DUX4 patients	James et al. 2019
NR2E3	ENSG00000031544	up	Relapsed vs. Non-relapsed DUX4 patients	James et al. 2019
CTD-2384B11.2	ENSG00000225407	up	Relapsed vs. Non-relapsed DUX4 patients	James et al. 2019
RP11-247L20.3	ENSG00000258857	up	Relapsed vs. Non-relapsed DUX4 patients	James et al. 2019
ZNF205-AS1	ENSG00000263214	up	Relapsed vs. Non-relapsed DUX4 patients	James et al. 2019
AC004870.3	ENSG00000229192	up	Relapsed vs. Non-relapsed DUX4 patients	James et al. 2019
RP11-384C4.6	ENSG00000230063	up	Relapsed vs. Non-relapsed DUX4 patients	James et al. 2019
CTD-2651B20.7	ENSG00000259932	up	Relapsed vs. Non-relapsed DUX4 patients	James et al. 2019
AC009473.1	ENSG00000234141	up	Relapsed vs. Non-relapsed DUX4 patients	James et al. 2019
RP11-382E9.1	ENSG00000231718	up	Relapsed vs. Non-relapsed DUX4 patients	James et al. 2019
AC004901.1	ENSG00000232072	up	Relapsed vs. Non-relapsed DUX4 patients	James et al. 2019
RP11-778J15.1	ENSG00000250062	up	Relapsed vs. Non-relapsed DUX4 patients	James et al. 2019
RP11-439L8.4	ENSG00000223907	up	Relapsed vs. Non-relapsed DUX4 patients	James et al. 2019
RP11-462B18.2	ENSG00000231193	up	Relapsed vs. Non-relapsed DUX4 patients	James et al. 2019
PCCA-AS1	ENSG00000234650	up	Relapsed vs. Non-relapsed DUX4 patients	James et al. 2019
XXbac-B476C20.14	ENSG00000235445	up	Relapsed vs. Non-relapsed DUX4 patients	James et al. 2019
CTD-2005H7.2	ENSG00000255250	up	Relapsed vs. Non-relapsed DUX4 patients	James et al. 2019
RP11-63K6.7	ENSG00000232532	up	Relapsed vs. Non-relapsed DUX4 patients	James et al. 2019
AF131216.5	ENSG00000255020	up	Relapsed vs. Non-relapsed DUX4 patients	James et al. 2019
RP11-333E1.2	ENSG00000263164	up	Relapsed vs. Non-relapsed DUX4 patients	James et al. 2019
RP11-264M12.2	ENSG00000261707	up	Relapsed vs. Non-relapsed DUX4 patients	James et al. 2019
AC016700.3	ENSG00000226505	up	Relapsed vs. Non-relapsed DUX4 patients	James et al. 2019
RP11-532F12.5	ENSG00000261183	up	Relapsed vs. Non-relapsed DUX4 patients	James et al. 2019
RP4-655J12.5	ENSG00000230381	up	Relapsed vs. Non-relapsed DUX4 patients	James et al. 2019
MIR4523	ENSG00000264808	up	Relapsed vs. Non-relapsed DUX4 patients	James et al. 2019
RP11-394O9.1	ENSG00000230945	up	Relapsed vs. Non-relapsed DUX4 patients	James et al. 2019
LA16c-390H2.4	ENSG00000262312	up	Relapsed vs. Non-relapsed DUX4 patients	James et al. 2019
RP11-474P2.4	ENSG00000257496	up	Relapsed vs. Non-relapsed DUX4 patients	James et al. 2019
AC073236.3	ENSG00000234722	up	Relapsed vs. Non-relapsed DUX4 patients	James et al. 2019
CTC-348L5.1	ENSG00000253687	up	Relapsed vs. Non-relapsed DUX4 patients	James et al. 2019
RP11-559M23.1	ENSG00000273106	up	Relapsed vs. Non-relapsed DUX4 patients	James et al. 2019
LY86-AS1	ENSG00000216863	up	Relapsed vs. Non-relapsed DUX4 patients	James et al. 2019
RP11-50B3.2	ENSG00000254833	up	Relapsed vs. Non-relapsed DUX4 patients	James et al. 2019
RP11-885B4.2	ENSG00000255669	up	Relapsed vs. Non-relapsed DUX4 patients	James et al. 2019
RP11-395B7.4	ENSG00000227053	up	Relapsed vs. Non-relapsed DUX4 patients	James et al. 2019
ZRANB2-AS2	ENSG00000229956	up	Relapsed vs. Non-relapsed DUX4 patients	James et al. 2019
AC005262.2	ENSG00000267688	up	Relapsed vs. Non-relapsed DUX4 patients	James et al. 2019
RP11-159F24.5	ENSG00000248240	up	Relapsed vs. Non-relapsed DUX4 patients	James et al. 2019
CTC-529G1.1	ENSG00000254391	up	Relapsed vs. Non-relapsed DUX4 patients	James et al. 2019
LINC01122	ENSG00000233723	up	Relapsed vs. Non-relapsed DUX4 patients	James et al. 2019
RP11-170N16.3	ENSG00000273007	up	Relapsed vs. Non-relapsed DUX4 patients	James et al. 2019
RP11-907D1.1	ENSG00000259026	up	Relapsed vs. Non-relapsed DUX4 patients	James et al. 2019
RP11-544I20.2	ENSG00000214770	up	Relapsed vs. Non-relapsed DUX4 patients	James et al. 2019
AC007292.7	ENSG00000269425	up	Relapsed vs. Non-relapsed DUX4 patients	James et al. 2019
RP11-247A12.2	ENSG00000204055	up	Relapsed vs. Non-relapsed DUX4 patients	James et al. 2019
RP11-425I13.3	ENSG00000196951	up	Relapsed vs. Non-relapsed DUX4 patients	James et al. 2019
AC016907.3	ENSG00000233862	up	Relapsed vs. Non-relapsed DUX4 patients	James et al. 2019
CTC-228N24.1	ENSG00000230561	up	Relapsed vs. Non-relapsed DUX4 patients	James et al. 2019
RP11-15F12.1	ENSG00000264269	up	Relapsed vs. Non-relapsed DUX4 patients	James et al. 2019
CCND2-AS1	ENSG00000256164	up	Relapsed vs. Non-relapsed DUX4 patients	James et al. 2019
RP11-122G18.8	ENSG00000273075	up	Relapsed vs. Non-relapsed DUX4 patients	James et al. 2019
RP4-655J12.4	ENSG00000233154	up	Relapsed vs. Non-relapsed DUX4 patients	James et al. 2019
RP1-16A9.1	ENSG00000253983	up	Relapsed vs. Non-relapsed DUX4 patients	James et al. 2019
RP11-20G13.3	ENSG00000259590	up	Relapsed vs. Non-relapsed DUX4 patients	James et al. 2019
BIRC6-AS1	ENSG00000230046	up	Relapsed vs. Non-relapsed DUX4 patients	James et al. 2019
AC009501.4	ENSG00000231609	up	Relapsed vs. Non-relapsed DUX4 patients	James et al. 2019
RP11-22A3.2	ENSG00000250371	up	Relapsed vs. Non-relapsed DUX4 patients	James et al. 2019
RP11-328K4.1	ENSG00000248740	up	Relapsed vs. Non-relapsed DUX4 patients	James et al. 2019
ESRG	ENSG00000265992	up	Relapsed vs. Non-relapsed DUX4 patients	James et al. 2019
RP11-523O18.1	ENSG00000226576	up	Relapsed vs. Non-relapsed DUX4 patients	James et al. 2019
CTD-2651B20.3	ENSG00000259520	up	Relapsed vs. Non-relapsed DUX4 patients	James et al. 2019
RP11-172E9.2	ENSG00000230058	up	Relapsed vs. Non-relapsed DUX4 patients	James et al. 2019
SPATA41	ENSG00000189419	up	Relapsed vs. Non-relapsed DUX4 patients	James et al. 2019
AC017076.5	ENSG00000225964	up	Relapsed vs. Non-relapsed DUX4 patients	James et al. 2019
CTB-26E19.1	ENSG00000245688	up	Relapsed vs. Non-relapsed DUX4 patients	James et al. 2019
RP11-97O12.7	ENSG00000173867	up	Relapsed vs. Non-relapsed DUX4 patients	James et al. 2019
RP11-262H14.1	ENSG00000238113	up	Relapsed vs. Non-relapsed DUX4 patients	James et al. 2019
RP11-477J21.6	ENSG00000239593	up	Relapsed vs. Non-relapsed DUX4 patients	James et al. 2019
RP11-1070N10.5	ENSG00000258927	up	Relapsed vs. Non-relapsed DUX4 patients	James et al. 2019
CTD-3060P21.1	ENSG00000262884	up	Relapsed vs. Non-relapsed DUX4 patients	James et al. 2019
LINC00642	ENSG00000233208	up	Relapsed vs. Non-relapsed DUX4 patients	James et al. 2019
RP1-212P9.2	ENSG00000226852	up	Relapsed vs. Non-relapsed DUX4 patients	James et al. 2019
RP11-214K3.24	ENSG00000269923	up	Relapsed vs. Non-relapsed DUX4 patients	James et al. 2019
RP11-128B16.3	ENSG00000236894	up	Relapsed vs. Non-relapsed DUX4 patients	James et al. 2019
RP11-1157N2__B.2	ENSG00000265737	up	Relapsed vs. Non-relapsed DUX4 patients	James et al. 2019
LINC01140	ENSG00000267272	up	Relapsed vs. Non-relapsed DUX4 patients	James et al. 2019
RP11-728K20.2	ENSG00000260555	up	Relapsed vs. Non-relapsed DUX4 patients	James et al. 2019
RP11-16L9.3	ENSG00000233410	up	Relapsed vs. Non-relapsed DUX4 patients	James et al. 2019
AC005775.2	ENSG00000266933	up	Relapsed vs. Non-relapsed DUX4 patients	James et al. 2019
RP11-752G15.8	ENSG00000259442	up	Relapsed vs. Non-relapsed DUX4 patients	James et al. 2019
RP1-29C18.10	ENSG00000212939	up	Relapsed vs. Non-relapsed DUX4 patients	James et al. 2019
SLC9A9-AS2	ENSG00000244493	up	Relapsed vs. Non-relapsed DUX4 patients	James et al. 2019
RP11-359G22.2	ENSG00000230400	up	Relapsed vs. Non-relapsed DUX4 patients	James et al. 2019
CTD-2528L19.6	ENSG00000267152	up	Relapsed vs. Non-relapsed DUX4 patients	James et al. 2019
RP11-433J8.1	ENSG00000258702	up	Relapsed vs. Non-relapsed DUX4 patients	James et al. 2019
RP11-563M4.1	ENSG00000249752	up	Relapsed vs. Non-relapsed DUX4 patients	James et al. 2019
RP11-21J18.1	ENSG00000265257	up	Relapsed vs. Non-relapsed DUX4 patients	James et al. 2019
RP11-478C19.2	ENSG00000258210	up	Relapsed vs. Non-relapsed DUX4 patients	James et al. 2019
RP11-981G7.1	ENSG00000261451	up	Relapsed vs. Non-relapsed DUX4 patients	James et al. 2019
RP11-186F10.2	ENSG00000257761	up	Relapsed vs. Non-relapsed DUX4 patients	James et al. 2019
CTD-3064H18.4	ENSG00000180458	up	Relapsed vs. Non-relapsed DUX4 patients	James et al. 2019
RP11-379F4.4	ENSG00000240207	up	Relapsed vs. Non-relapsed DUX4 patients	James et al. 2019
RP11-35G9.5	ENSG00000267787	up	Relapsed vs. Non-relapsed DUX4 patients	James et al. 2019
RP11-715J22.2	ENSG00000259895	up	Relapsed vs. Non-relapsed DUX4 patients	James et al. 2019
AC008834.1	ENSG00000248901	up	Relapsed vs. Non-relapsed DUX4 patients	James et al. 2019
RP11-355N15.1	ENSG00000259293	up	Relapsed vs. Non-relapsed DUX4 patients	James et al. 2019
RP11-686D22.8	ENSG00000267745	up	Relapsed vs. Non-relapsed DUX4 patients	James et al. 2019
RP11-23J9.4	ENSG00000255036	up	Relapsed vs. Non-relapsed DUX4 patients	James et al. 2019
CTBP1-AS2	ENSG00000196810	up	Relapsed vs. Non-relapsed DUX4 patients	James et al. 2019
SNORD116-20	ENSG00000261069	up	Relapsed vs. Non-relapsed DUX4 patients	James et al. 2019
LA16c-OS12.2	ENSG00000268836	up	Relapsed vs. Non-relapsed DUX4 patients	James et al. 2019
RP11-1070N10.6	ENSG00000259084	up	Relapsed vs. Non-relapsed DUX4 patients	James et al. 2019
RP11-21L23.2	ENSG00000261578	up	Relapsed vs. Non-relapsed DUX4 patients	James et al. 2019
RP11-24I21.1	ENSG00000248210	up	Relapsed vs. Non-relapsed DUX4 patients	James et al. 2019
RP5-1092A3.4	ENSG00000270605	up	Relapsed vs. Non-relapsed DUX4 patients	James et al. 2019
KMT2E-AS1	ENSG00000239569	up	Relapsed vs. Non-relapsed DUX4 patients	James et al. 2019
CTC-428G20.6	ENSG00000271797	up	Relapsed vs. Non-relapsed DUX4 patients	James et al. 2019
AC003090.1	ENSG00000223561	up	Relapsed vs. Non-relapsed DUX4 patients	James et al. 2019
TAPT1-AS1	ENSG00000263327	up	Relapsed vs. Non-relapsed DUX4 patients	James et al. 2019
RP11-345M22.1	ENSG00000260876	up	Relapsed vs. Non-relapsed DUX4 patients	James et al. 2019
RP11-446J8.1	ENSG00000248138	up	Relapsed vs. Non-relapsed DUX4 patients	James et al. 2019
RP11-122G18.5	ENSG00000235477	up	Relapsed vs. Non-relapsed DUX4 patients	James et al. 2019
TCL6	ENSG00000187621	up	Relapsed vs. Non-relapsed DUX4 patients	James et al. 2019
AC009948.5	ENSG00000223960	up	Relapsed vs. Non-relapsed DUX4 patients	James et al. 2019
RP11-710F7.3	ENSG00000249635	up	Relapsed vs. Non-relapsed DUX4 patients	James et al. 2019
AF127936.3	ENSG00000232884	up	Relapsed vs. Non-relapsed DUX4 patients	James et al. 2019
RP11-575L7.4	ENSG00000231616	up	Relapsed vs. Non-relapsed DUX4 patients	James et al. 2019
CTB-57H20.1	ENSG00000249881	up	Relapsed vs. Non-relapsed DUX4 patients	James et al. 2019
RP11-752D24.2	ENSG00000248115	up	Relapsed vs. Non-relapsed DUX4 patients	James et al. 2019
RP13-635I23.3	ENSG00000240888	up	Relapsed vs. Non-relapsed DUX4 patients	James et al. 2019
LINC00910	ENSG00000188825	up	Relapsed vs. Non-relapsed DUX4 patients	James et al. 2019
RP5-1180C10.2	ENSG00000230124	up	Relapsed vs. Non-relapsed DUX4 patients	James et al. 2019
RP11-2E11.5	ENSG00000259920	up	Relapsed vs. Non-relapsed DUX4 patients	James et al. 2019
RP11-452L6.1	ENSG00000261474	up	Relapsed vs. Non-relapsed DUX4 patients	James et al. 2019
RP11-228B15.4	ENSG00000225032	up	Relapsed vs. Non-relapsed DUX4 patients	James et al. 2019
AC107218.3	ENSG00000197585	up	Relapsed vs. Non-relapsed DUX4 patients	James et al. 2019
LINC00264	ENSG00000233261	up	Relapsed vs. Non-relapsed DUX4 patients	James et al. 2019
AC007249.3	ENSG00000217258	up	Relapsed vs. Non-relapsed DUX4 patients	James et al. 2019
RP11-329J18.3	ENSG00000260744	up	Relapsed vs. Non-relapsed DUX4 patients	James et al. 2019
CTC-436K13.3	ENSG00000253424	up	Relapsed vs. Non-relapsed DUX4 patients	James et al. 2019
AC144521.1	ENSG00000228956	up	Relapsed vs. Non-relapsed DUX4 patients	James et al. 2019
RP13-20L14.1	ENSG00000260011	up	Relapsed vs. Non-relapsed DUX4 patients	James et al. 2019
RP11-347C18.3	ENSG00000253878	up	Relapsed vs. Non-relapsed DUX4 patients	James et al. 2019
RP11-18I14.10	ENSG00000269609	up	Relapsed vs. Non-relapsed DUX4 patients	James et al. 2019
RP4-782L23.1	ENSG00000231816	up	Relapsed vs. Non-relapsed DUX4 patients	James et al. 2019
MCM3AP-AS1	ENSG00000215424	up	Relapsed vs. Non-relapsed DUX4 patients	James et al. 2019
RP11-305E17.6	ENSG00000224616	up	Relapsed vs. Non-relapsed DUX4 patients	James et al. 2019
RP11-473M20.7	ENSG00000261971	up	Relapsed vs. Non-relapsed DUX4 patients	James et al. 2019
AC005304.1	ENSG00000233852	up	Relapsed vs. Non-relapsed DUX4 patients	James et al. 2019
RP11-527F13.1	ENSG00000231842	up	Relapsed vs. Non-relapsed DUX4 patients	James et al. 2019
RP3-414A15.2	ENSG00000258695	up	Relapsed vs. Non-relapsed DUX4 patients	James et al. 2019
CTC-436K13.6	ENSG00000253449	up	Relapsed vs. Non-relapsed DUX4 patients	James et al. 2019
LINC00174	ENSG00000179406	up	Relapsed vs. Non-relapsed DUX4 patients	James et al. 2019
RP11-10K16.1	ENSG00000245213	up	Relapsed vs. Non-relapsed DUX4 patients	James et al. 2019
CTD-2555O16.1	ENSG00000258809	up	Relapsed vs. Non-relapsed DUX4 patients	James et al. 2019
RP11-80H8.4	ENSG00000241679	up	Relapsed vs. Non-relapsed DUX4 patients	James et al. 2019
RP11-389O22.1	ENSG00000236066	up	Relapsed vs. Non-relapsed DUX4 patients	James et al. 2019
RP11-473M20.11	ENSG00000263011	up	Relapsed vs. Non-relapsed DUX4 patients	James et al. 2019
U51244.2	ENSG00000228481	up	Relapsed vs. Non-relapsed DUX4 patients	James et al. 2019
RP11-171I2.1	ENSG00000267784	up	Relapsed vs. Non-relapsed DUX4 patients	James et al. 2019
PCDH9-AS4	ENSG00000233840	up	Relapsed vs. Non-relapsed DUX4 patients	James et al. 2019
RP13-216E22.5	ENSG00000271199	up	Relapsed vs. Non-relapsed DUX4 patients	James et al. 2019
INTS6-AS1	ENSG00000236778	up	Relapsed vs. Non-relapsed DUX4 patients	James et al. 2019
CTD-2006C1.12	ENSG00000267274	up	Relapsed vs. Non-relapsed DUX4 patients	James et al. 2019
RAD51-AS1	ENSG00000245849	up	Relapsed vs. Non-relapsed DUX4 patients	James et al. 2019
RP11-542A14.1	ENSG00000254350	up	Relapsed vs. Non-relapsed DUX4 patients	James et al. 2019
RP11-527H14.4	ENSG00000263618	up	Relapsed vs. Non-relapsed DUX4 patients	James et al. 2019
RP11-403A21.3	ENSG00000265204	up	Relapsed vs. Non-relapsed DUX4 patients	James et al. 2019
RP11-554I8.1	ENSG00000225948	up	Relapsed vs. Non-relapsed DUX4 patients	James et al. 2019
RP11-499P20.2	ENSG00000240291	up	Relapsed vs. Non-relapsed DUX4 patients	James et al. 2019
RP11-477N3.1	ENSG00000272156	up	Relapsed vs. Non-relapsed DUX4 patients	James et al. 2019
RP5-888M10.2	ENSG00000229484	up	Relapsed vs. Non-relapsed DUX4 patients	James et al. 2019
RP11-218L14.4	ENSG00000225393	up	Relapsed vs. Non-relapsed DUX4 patients	James et al. 2019
RP13-228J13.1	ENSG00000224216	up	Relapsed vs. Non-relapsed DUX4 patients	James et al. 2019
CTA-211A9.5	ENSG00000244625	up	Relapsed vs. Non-relapsed DUX4 patients	James et al. 2019
RP11-466F5.8	ENSG00000224358	up	Relapsed vs. Non-relapsed DUX4 patients	James et al. 2019
RP11-572M11.3	ENSG00000243795	up	Relapsed vs. Non-relapsed DUX4 patients	James et al. 2019
RP11-593F23.1	ENSG00000259422	up	Relapsed vs. Non-relapsed DUX4 patients	James et al. 2019
SLC9A9-AS1	ENSG00000240012	up	Relapsed vs. Non-relapsed DUX4 patients	James et al. 2019
RP11-35J23.1	ENSG00000229418	up	Relapsed vs. Non-relapsed DUX4 patients	James et al. 2019
MIR181A1HG	ENSG00000229989	up	Relapsed vs. Non-relapsed DUX4 patients	James et al. 2019
RP4-718N17.2	ENSG00000229403	up	Relapsed vs. Non-relapsed DUX4 patients	James et al. 2019
RP11-418J17.1	ENSG00000231365	up	Relapsed vs. Non-relapsed DUX4 patients	James et al. 2019
RP11-689B22.2	ENSG00000257221	up	Relapsed vs. Non-relapsed DUX4 patients	James et al. 2019
CTB-133G6.2	ENSG00000267852	up	Relapsed vs. Non-relapsed DUX4 patients	James et al. 2019
RP5-1086K13.1	ENSG00000224950	up	Relapsed vs. Non-relapsed DUX4 patients	James et al. 2019
AD000090.2	ENSG00000236144	up	Relapsed vs. Non-relapsed DUX4 patients	James et al. 2019
RP1-90L6.2	ENSG00000223704	up	Relapsed vs. Non-relapsed DUX4 patients	James et al. 2019
RP11-328D5.1	ENSG00000226202	up	Relapsed vs. Non-relapsed DUX4 patients	James et al. 2019
CTC-436K13.2	ENSG00000253134	up	Relapsed vs. Non-relapsed DUX4 patients	James et al. 2019
RP11-576N17.5	ENSG00000250057	up	Relapsed vs. Non-relapsed DUX4 patients	James et al. 2019
GMDS-AS1	ENSG00000250903	up	Relapsed vs. Non-relapsed DUX4 patients	James et al. 2019
COX10-AS1	ENSG00000236088	up	Relapsed vs. Non-relapsed DUX4 patients	James et al. 2019
BDNF-AS	ENSG00000245573	up	Relapsed vs. Non-relapsed DUX4 patients	James et al. 2019
CTD-2223O18.1	ENSG00000258748	up	Relapsed vs. Non-relapsed DUX4 patients	James et al. 2019
IGF2-AS	ENSG00000099869	up	Relapsed vs. Non-relapsed DUX4 patients	James et al. 2019
MEF2C-AS1	ENSG00000248309	up	Relapsed vs. Non-relapsed DUX4 patients	James et al. 2019
RP11-196G11.2	ENSG00000260911	up	Relapsed vs. Non-relapsed DUX4 patients	James et al. 2019
RP11-373N22.3	ENSG00000247199	up	Relapsed vs. Non-relapsed DUX4 patients	James et al. 2019
CTD-2619J13.14	ENSG00000232098	up	Relapsed vs. Non-relapsed DUX4 patients	James et al. 2019
RP11-682N22.1	ENSG00000272377	up	Relapsed vs. Non-relapsed DUX4 patients	James et al. 2019
RP11-473M20.14	ENSG00000263072	up	Relapsed vs. Non-relapsed DUX4 patients	James et al. 2019
TRAPPC12-AS1	ENSG00000225234	up	Relapsed vs. Non-relapsed DUX4 patients	James et al. 2019
RP11-1H15.2	ENSG00000255476	up	Relapsed vs. Non-relapsed DUX4 patients	James et al. 2019
RP11-395N3.2	ENSG00000272622	up	Relapsed vs. Non-relapsed DUX4 patients	James et al. 2019
RP11-796E2.4	ENSG00000245904	up	Relapsed vs. Non-relapsed DUX4 patients	James et al. 2019
CTD-2561B21.10	ENSG00000262098	up	Relapsed vs. Non-relapsed DUX4 patients	James et al. 2019
AC019118.2	ENSG00000234423	up	Relapsed vs. Non-relapsed DUX4 patients	James et al. 2019
AC147651.3	ENSG00000223855	up	Relapsed vs. Non-relapsed DUX4 patients	James et al. 2019
RP11-423H2.3	ENSG00000249684	up	Relapsed vs. Non-relapsed DUX4 patients	James et al. 2019
CTD-3116E22.7	ENSG00000267612	up	Relapsed vs. Non-relapsed DUX4 patients	James et al. 2019
AP001630.5	ENSG00000224100	up	Relapsed vs. Non-relapsed DUX4 patients	James et al. 2019
AC024704.2	ENSG00000244063	up	Relapsed vs. Non-relapsed DUX4 patients	James et al. 2019
RP1-309F20.3	ENSG00000225806	up	Relapsed vs. Non-relapsed DUX4 patients	James et al. 2019
AC005625.1	ENSG00000266963	up	Relapsed vs. Non-relapsed DUX4 patients	James et al. 2019
RP11-523O18.5	ENSG00000233665	up	Relapsed vs. Non-relapsed DUX4 patients	James et al. 2019
SRRM2-AS1	ENSG00000205913	up	Relapsed vs. Non-relapsed DUX4 patients	James et al. 2019
AC005224.2	ENSG00000231595	up	Relapsed vs. Non-relapsed DUX4 patients	James et al. 2019
RP11-554E23.4	ENSG00000257222	up	Relapsed vs. Non-relapsed DUX4 patients	James et al. 2019
RP11-165F24.3	ENSG00000227155	up	Relapsed vs. Non-relapsed DUX4 patients	James et al. 2019
RP11-333E1.1	ENSG00000261879	up	Relapsed vs. Non-relapsed DUX4 patients	James et al. 2019
XXYLT1-AS1	ENSG00000233303	up	Relapsed vs. Non-relapsed DUX4 patients	James et al. 2019
GRIFIN	ENSG00000236734	up	Relapsed vs. Non-relapsed DUX4 patients	James et al. 2019
DICER1-AS1	ENSG00000235706	up	Relapsed vs. Non-relapsed DUX4 patients	James et al. 2019
AC012358.7	ENSG00000203327	up	Relapsed vs. Non-relapsed DUX4 patients	James et al. 2019
USP46-AS1	ENSG00000248866	up	Relapsed vs. Non-relapsed DUX4 patients	James et al. 2019
TRMT2B-AS1	ENSG00000225839	up	Relapsed vs. Non-relapsed DUX4 patients	James et al. 2019
RP11-49O14.2	ENSG00000236095	up	Relapsed vs. Non-relapsed DUX4 patients	James et al. 2019
RP11-89N17.4	ENSG00000236494	up	Relapsed vs. Non-relapsed DUX4 patients	James et al. 2019
RP11-876N24.4	ENSG00000262222	up	Relapsed vs. Non-relapsed DUX4 patients	James et al. 2019
RP11-216N14.9	ENSG00000233222	up	Relapsed vs. Non-relapsed DUX4 patients	James et al. 2019
AC017116.11	ENSG00000239775	up	Relapsed vs. Non-relapsed DUX4 patients	James et al. 2019
RP11-229P13.20	ENSG00000235117	up	Relapsed vs. Non-relapsed DUX4 patients	James et al. 2019
RP11-16E12.2	ENSG00000259772	up	Relapsed vs. Non-relapsed DUX4 patients	James et al. 2019
RP11-227G15.2	ENSG00000265139	up	Relapsed vs. Non-relapsed DUX4 patients	James et al. 2019
AC003682.16	ENSG00000268392	up	Relapsed vs. Non-relapsed DUX4 patients	James et al. 2019
RP11-79N23.1	ENSG00000227885	up	Relapsed vs. Non-relapsed DUX4 patients	James et al. 2019
RP11-90L20.2	ENSG00000235121	up	Relapsed vs. Non-relapsed DUX4 patients	James et al. 2019
SPTY2D1-AS1	ENSG00000247595	up	Relapsed vs. Non-relapsed DUX4 patients	James et al. 2019
AC008088.4	ENSG00000260907	up	Relapsed vs. Non-relapsed DUX4 patients	James et al. 2019
RP11-95O2.5	ENSG00000267707	up	Relapsed vs. Non-relapsed DUX4 patients	James et al. 2019
RP11-87G24.3	ENSG00000267568	up	Relapsed vs. Non-relapsed DUX4 patients	James et al. 2019
RP11-269F20.1	ENSG00000236031	up	Relapsed vs. Non-relapsed DUX4 patients	James et al. 2019
CTD-2541M15.1	ENSG00000249898	up	Relapsed vs. Non-relapsed DUX4 patients	James et al. 2019
RP11-80H8.3	ENSG00000243733	up	Relapsed vs. Non-relapsed DUX4 patients	James et al. 2019
RP11-355F16.1	ENSG00000270571	up	Relapsed vs. Non-relapsed DUX4 patients	James et al. 2019
RP11-724M22.1	ENSG00000251523	up	Relapsed vs. Non-relapsed DUX4 patients	James et al. 2019
STAG3L5P-PVRIG2P-PILRB	ENSG00000272752	up	Relapsed vs. Non-relapsed DUX4 patients	James et al. 2019
CCND2-AS2	ENSG00000255920	up	Relapsed vs. Non-relapsed DUX4 patients	James et al. 2019
LINC00959	ENSG00000237489	up	Relapsed vs. Non-relapsed DUX4 patients	James et al. 2019
CTD-2245F17.3	ENSG00000269051	up	Relapsed vs. Non-relapsed DUX4 patients	James et al. 2019
RP11-267N12.3	ENSG00000232995	up	Relapsed vs. Non-relapsed DUX4 patients	James et al. 2019
RP11-35G9.3	ENSG00000267040	up	Relapsed vs. Non-relapsed DUX4 patients	James et al. 2019
RP11-395D3.1	ENSG00000232211	up	Relapsed vs. Non-relapsed DUX4 patients	James et al. 2019
CTD-2619J13.3	ENSG00000269054	up	Relapsed vs. Non-relapsed DUX4 patients	James et al. 2019
RP1-122P22.2	ENSG00000233895	up	Relapsed vs. Non-relapsed DUX4 patients	James et al. 2019
RP11-540B6.6	ENSG00000270015	up	Relapsed vs. Non-relapsed DUX4 patients	James et al. 2019
CTD-2201I18.1	ENSG00000249825	up	Relapsed vs. Non-relapsed DUX4 patients	James et al. 2019
LINC00571	ENSG00000223685	up	Relapsed vs. Non-relapsed DUX4 patients	James et al. 2019
TMLHE-AS1	ENSG00000224533	up	Relapsed vs. Non-relapsed DUX4 patients	James et al. 2019
PRSS51	ENSG00000253649	up	Relapsed vs. Non-relapsed DUX4 patients	James et al. 2019
AC012309.5	ENSG00000226686	up	Relapsed vs. Non-relapsed DUX4 patients	James et al. 2019
CTD-2324F15.2	ENSG00000250490	up	Relapsed vs. Non-relapsed DUX4 patients	James et al. 2019
LINC00954	ENSG00000228784	up	Relapsed vs. Non-relapsed DUX4 patients	James et al. 2019
PCDH9-AS3	ENSG00000225263	up	Relapsed vs. Non-relapsed DUX4 patients	James et al. 2019
RP11-135A24.2	ENSG00000229327	up	Relapsed vs. Non-relapsed DUX4 patients	James et al. 2019
AF131217.1	ENSG00000232855	up	Relapsed vs. Non-relapsed DUX4 patients	James et al. 2019
RP11-308D16.4	ENSG00000234062	up	Relapsed vs. Non-relapsed DUX4 patients	James et al. 2019
VAV3-AS1	ENSG00000230489	up	Relapsed vs. Non-relapsed DUX4 patients	James et al. 2019
RP11-260M19.2	ENSG00000258913	up	Relapsed vs. Non-relapsed DUX4 patients	James et al. 2019
RP11-219E7.1	ENSG00000258810	up	Relapsed vs. Non-relapsed DUX4 patients	James et al. 2019
MRPL23-AS1	ENSG00000226416	up	Relapsed vs. Non-relapsed DUX4 patients	James et al. 2019
GAS6-AS1	ENSG00000233695	up	Relapsed vs. Non-relapsed DUX4 patients	James et al. 2019
TMEM44-AS1	ENSG00000231770	up	Relapsed vs. Non-relapsed DUX4 patients	James et al. 2019
CTD-2011F17.2	ENSG00000255421	up	Relapsed vs. Non-relapsed DUX4 patients	James et al. 2019
RP11-685M7.3	ENSG00000246308	up	Relapsed vs. Non-relapsed DUX4 patients	James et al. 2019
RP11-218E20.3	ENSG00000258711	up	Relapsed vs. Non-relapsed DUX4 patients	James et al. 2019
Z83001.1	ENSG00000228061	up	Relapsed vs. Non-relapsed DUX4 patients	James et al. 2019
AC009495.3	ENSG00000232411	up	Relapsed vs. Non-relapsed DUX4 patients	James et al. 2019
SLC38A3	ENSG00000188338	down	Relapsed vs. Non-relapsed DUX4 patients	James et al. 2019
RP11-672A2.4	ENSG00000254810	down	Relapsed vs. Non-relapsed DUX4 patients	James et al. 2019
RP11-1151B14.4	ENSG00000267257	down	Relapsed vs. Non-relapsed DUX4 patients	James et al. 2019
RP4-714D9.5	ENSG00000261254	down	Relapsed vs. Non-relapsed DUX4 patients	James et al. 2019
AP001189.4	ENSG00000236304	down	Relapsed vs. Non-relapsed DUX4 patients	James et al. 2019
RP11-1036E20.9	ENSG00000214797	down	Relapsed vs. Non-relapsed DUX4 patients	James et al. 2019
CTC-459F4.1	ENSG00000261770	down	Relapsed vs. Non-relapsed DUX4 patients	James et al. 2019
RP11-182L21.5	ENSG00000272489	down	Relapsed vs. Non-relapsed DUX4 patients	James et al. 2019
ZBTB11-AS1	ENSG00000256628	down	Relapsed vs. Non-relapsed DUX4 patients	James et al. 2019
RP11-457M11.5	ENSG00000261584	down	Relapsed vs. Non-relapsed DUX4 patients	James et al. 2019
DGCR9	ENSG00000273032	down	Relapsed vs. Non-relapsed DUX4 patients	James et al. 2019
RP1-249H1.4	ENSG00000227502	down	Relapsed vs. Non-relapsed DUX4 patients	James et al. 2019
RP11-384L8.1	ENSG00000261572	down	Relapsed vs. Non-relapsed DUX4 patients	James et al. 2019
RP5-1063M23.2	ENSG00000236908	down	Relapsed vs. Non-relapsed DUX4 patients	James et al. 2019
RP11-15N24.4	ENSG00000261533	down	Relapsed vs. Non-relapsed DUX4 patients	James et al. 2019
AC104024.1	ENSG00000230709	down	Relapsed vs. Non-relapsed DUX4 patients	James et al. 2019
SLC7A11-AS1	ENSG00000250033	down	Relapsed vs. Non-relapsed DUX4 patients	James et al. 2019
RP11-486L19.2	ENSG00000250685	down	Relapsed vs. Non-relapsed DUX4 patients	James et al. 2019
LINC00163	ENSG00000234880	down	Relapsed vs. Non-relapsed DUX4 patients	James et al. 2019
LINC00877	ENSG00000241163	down	Relapsed vs. Non-relapsed DUX4 patients	James et al. 2019
RP11-359N11.1	ENSG00000230631	down	Relapsed vs. Non-relapsed DUX4 patients	James et al. 2019
CTD-2256P15.4	ENSG00000271980	down	Relapsed vs. Non-relapsed DUX4 patients	James et al. 2019
RP11-54O7.18	ENSG00000273443	down	Relapsed vs. Non-relapsed DUX4 patients	James et al. 2019
RP11-541N10.3	ENSG00000260461	down	Relapsed vs. Non-relapsed DUX4 patients	James et al. 2019
RP11-202G11.2	ENSG00000257746	down	Relapsed vs. Non-relapsed DUX4 patients	James et al. 2019
LUCAT1	ENSG00000248323	down	Relapsed vs. Non-relapsed DUX4 patients	James et al. 2019
LINC00638	ENSG00000258701	down	Relapsed vs. Non-relapsed DUX4 patients	James et al. 2019
PPP1R26-AS1	ENSG00000225361	down	Relapsed vs. Non-relapsed DUX4 patients	James et al. 2019
AC093627.12	ENSG00000240093	down	Relapsed vs. Non-relapsed DUX4 patients	James et al. 2019
CTD-2530H12.2	ENSG00000254826	down	Relapsed vs. Non-relapsed DUX4 patients	James et al. 2019
RP11-337C18.9	ENSG00000271721	down	Relapsed vs. Non-relapsed DUX4 patients	James et al. 2019
RP11-627G18.1	ENSG00000266283	down	Relapsed vs. Non-relapsed DUX4 patients	James et al. 2019
RP11-742D12.2	ENSG00000270112	down	Relapsed vs. Non-relapsed DUX4 patients	James et al. 2019
RP11-715F3.2	ENSG00000266783	down	Relapsed vs. Non-relapsed DUX4 patients	James et al. 2019
GRIP2	ENSG00000144596	down	Relapsed vs. Non-relapsed DUX4 patients	James et al. 2019
RP11-97O12.6	ENSG00000271997	down	Relapsed vs. Non-relapsed DUX4 patients	James et al. 2019
RP11-96K19.2	ENSG00000232811	down	Relapsed vs. Non-relapsed DUX4 patients	James et al. 2019
FAM222A-AS1	ENSG00000255650	down	Relapsed vs. Non-relapsed DUX4 patients	James et al. 2019
AC002511.3	ENSG00000232680	down	Relapsed vs. Non-relapsed DUX4 patients	James et al. 2019
RP11-459E5.1	ENSG00000253125	down	Relapsed vs. Non-relapsed DUX4 patients	James et al. 2019
RP11-18F14.1	ENSG00000260737	down	Relapsed vs. Non-relapsed DUX4 patients	James et al. 2019
FAM225A	ENSG00000231528	down	Relapsed vs. Non-relapsed DUX4 patients	James et al. 2019
RP11-619A14.2	ENSG00000254933	down	Relapsed vs. Non-relapsed DUX4 patients	James et al. 2019
LINC00574	ENSG00000231690	down	Relapsed vs. Non-relapsed DUX4 patients	James et al. 2019
AC114730.2	ENSG00000235151	down	Relapsed vs. Non-relapsed DUX4 patients	James et al. 2019
LINC00514	ENSG00000262152	down	Relapsed vs. Non-relapsed DUX4 patients	James et al. 2019
RP11-389C8.3	ENSG00000272365	down	Relapsed vs. Non-relapsed DUX4 patients	James et al. 2019
FAM225B	ENSG00000225684	down	Relapsed vs. Non-relapsed DUX4 patients	James et al. 2019
LINC00599	ENSG00000253230	down	Relapsed vs. Non-relapsed DUX4 patients	James et al. 2019
RP13-152O15.5	ENSG00000237371	down	Relapsed vs. Non-relapsed DUX4 patients	James et al. 2019
RP11-359E3.4	ENSG00000272631	down	Relapsed vs. Non-relapsed DUX4 patients	James et al. 2019
AC016738.4	ENSG00000223947	down	Relapsed vs. Non-relapsed DUX4 patients	James et al. 2019
LINC00312	ENSG00000237697	down	Relapsed vs. Non-relapsed DUX4 patients	James et al. 2019
AC139099.6	ENSG00000262952	down	Relapsed vs. Non-relapsed DUX4 patients	James et al. 2019
AP001628.7	ENSG00000233754	down	Relapsed vs. Non-relapsed DUX4 patients	James et al. 2019
RP11-1100L3.8	ENSG00000259884	down	Relapsed vs. Non-relapsed DUX4 patients	James et al. 2019
RP11-429E11.2	ENSG00000225106	down	Relapsed vs. Non-relapsed DUX4 patients	James et al. 2019
RP11-377G16.2	ENSG00000248719	down	Relapsed vs. Non-relapsed DUX4 patients	James et al. 2019
RP11-16K12.1	ENSG00000177699	down	Relapsed vs. Non-relapsed DUX4 patients	James et al. 2019
CTD-2006K23.1	ENSG00000261222	down	Relapsed vs. Non-relapsed DUX4 patients	James et al. 2019
RP3-512B11.3	ENSG00000261189	down	Relapsed vs. Non-relapsed DUX4 patients	James et al. 2019
RP11-309L24.2	ENSG00000242902	down	Relapsed vs. Non-relapsed DUX4 patients	James et al. 2019
RP1-37N7.1	ENSG00000264177	down	Relapsed vs. Non-relapsed DUX4 patients	James et al. 2019
RP11-351I24.1	ENSG00000254554	down	Relapsed vs. Non-relapsed DUX4 patients	James et al. 2019
RP11-536K7.5	ENSG00000229664	down	Relapsed vs. Non-relapsed DUX4 patients	James et al. 2019
AC017002.1	ENSG00000240350	down	Relapsed vs. Non-relapsed DUX4 patients	James et al. 2019
RP11-74C13.3	ENSG00000230550	down	Relapsed vs. Non-relapsed DUX4 patients	James et al. 2019
AC004837.4	ENSG00000231951	down	Relapsed vs. Non-relapsed DUX4 patients	James et al. 2019
MIR503HG	ENSG00000223749	down	Relapsed vs. Non-relapsed DUX4 patients	James et al. 2019
RP3-329E20.2	ENSG00000236936	down	Relapsed vs. Non-relapsed DUX4 patients	James et al. 2019
RP11-227D13.4	ENSG00000259469	down	Relapsed vs. Non-relapsed DUX4 patients	James et al. 2019
RP11-298J20.4	ENSG00000249456	down	Relapsed vs. Non-relapsed DUX4 patients	James et al. 2019
RP11-21M24.2	ENSG00000260790	down	Relapsed vs. Non-relapsed DUX4 patients	James et al. 2019
RP11-17J14.2	ENSG00000266495	down	Relapsed vs. Non-relapsed DUX4 patients	James et al. 2019
RP11-222G7.2	ENSG00000272748	down	Relapsed vs. Non-relapsed DUX4 patients	James et al. 2019
RP11-320G24.1	ENSG00000236393	down	Relapsed vs. Non-relapsed DUX4 patients	James et al. 2019
RP11-806H10.4	ENSG00000266970	down	Relapsed vs. Non-relapsed DUX4 patients	James et al. 2019
RP11-295M18.6	ENSG00000272823	down	Relapsed vs. Non-relapsed DUX4 patients	James et al. 2019
CTC-241F20.3	ENSG00000268001	down	Relapsed vs. Non-relapsed DUX4 patients	James et al. 2019
RP11-400N13.3	ENSG00000232679	down	Relapsed vs. Non-relapsed DUX4 patients	James et al. 2019
AC114730.3	ENSG00000224272	down	Relapsed vs. Non-relapsed DUX4 patients	James et al. 2019
FARP1-AS1	ENSG00000231194	down	Relapsed vs. Non-relapsed DUX4 patients	James et al. 2019
LINC01010	ENSG00000236700	down	Relapsed vs. Non-relapsed DUX4 patients	James et al. 2019
RP11-301L8.2	ENSG00000233110	down	Relapsed vs. Non-relapsed DUX4 patients	James et al. 2019
RP11-350J20.5	ENSG00000231760	down	Relapsed vs. Non-relapsed DUX4 patients	James et al. 2019
SPACA6P-AS	ENSG00000269959	down	Relapsed vs. Non-relapsed DUX4 patients	James et al. 2019
RP11-94C24.11	ENSG00000250976	down	Relapsed vs. Non-relapsed DUX4 patients	James et al. 2019
AC010095.5	ENSG00000228763	down	Relapsed vs. Non-relapsed DUX4 patients	James et al. 2019
RP11-557C18.4	ENSG00000259631	down	Relapsed vs. Non-relapsed DUX4 patients	James et al. 2019
RP11-219G17.4	ENSG00000204277	down	Relapsed vs. Non-relapsed DUX4 patients	James et al. 2019
RP11-655M14.12	ENSG00000255119	down	Relapsed vs. Non-relapsed DUX4 patients	James et al. 2019
RP11-728F11.4	ENSG00000254528	down	Relapsed vs. Non-relapsed DUX4 patients	James et al. 2019
DSCR9	ENSG00000230366	down	Relapsed vs. Non-relapsed DUX4 patients	James et al. 2019
RP11-243M5.1	ENSG00000256204	down	Relapsed vs. Non-relapsed DUX4 patients	James et al. 2019
RP3-416H24.1	ENSG00000257671	down	Relapsed vs. Non-relapsed DUX4 patients	James et al. 2019
LINC00535	ENSG00000246662	down	Relapsed vs. Non-relapsed DUX4 patients	James et al. 2019
AC007327.5	ENSG00000229679	down	Relapsed vs. Non-relapsed DUX4 patients	James et al. 2019
AC073257.2	ENSG00000237614	down	Relapsed vs. Non-relapsed DUX4 patients	James et al. 2019
LINC00639	ENSG00000259070	down	Relapsed vs. Non-relapsed DUX4 patients	James et al. 2019
RP11-568J23.6	ENSG00000270159	down	Relapsed vs. Non-relapsed DUX4 patients	James et al. 2019
LINC00659	ENSG00000228705	down	Relapsed vs. Non-relapsed DUX4 patients	James et al. 2019
RP1-37C10.3	ENSG00000226526	down	Relapsed vs. Non-relapsed DUX4 patients	James et al. 2019
AC004837.5	ENSG00000228554	down	Relapsed vs. Non-relapsed DUX4 patients	James et al. 2019
RP1-167G20.1	ENSG00000248150	down	Relapsed vs. Non-relapsed DUX4 patients	James et al. 2019
AC092198.1	ENSG00000223486	down	Relapsed vs. Non-relapsed DUX4 patients	James et al. 2019
RP11-701P16.5	ENSG00000251230	down	Relapsed vs. Non-relapsed DUX4 patients	James et al. 2019
AC008937.3	ENSG00000225230	down	Relapsed vs. Non-relapsed DUX4 patients	James et al. 2019
RP5-1096D14.6	ENSG00000203593	down	Relapsed vs. Non-relapsed DUX4 patients	James et al. 2019
AP000355.2	ENSG00000228923	down	Relapsed vs. Non-relapsed DUX4 patients	James et al. 2019
RP11-588G21.2	ENSG00000247131	down	Relapsed vs. Non-relapsed DUX4 patients	James et al. 2019
AC074289.1	ENSG00000225889	down	Relapsed vs. Non-relapsed DUX4 patients	James et al. 2019
RP11-392E22.10	ENSG00000272934	down	Relapsed vs. Non-relapsed DUX4 patients	James et al. 2019
AC099552.3	ENSG00000228521	down	Relapsed vs. Non-relapsed DUX4 patients	James et al. 2019
XXbac-B135H6.15	ENSG00000237476	down	Relapsed vs. Non-relapsed DUX4 patients	James et al. 2019
RP11-290F20.1	ENSG00000203999	down	Relapsed vs. Non-relapsed DUX4 patients	James et al. 2019
RP11-651L5.2	ENSG00000258355	down	Relapsed vs. Non-relapsed DUX4 patients	James et al. 2019
RP11-54A4.2	ENSG00000237781	down	Relapsed vs. Non-relapsed DUX4 patients	James et al. 2019
AP001625.6	ENSG00000235772	down	Relapsed vs. Non-relapsed DUX4 patients	James et al. 2019
CTA-384D8.31	ENSG00000226738	down	Relapsed vs. Non-relapsed DUX4 patients	James et al. 2019
RP11-122M14.1	ENSG00000231057	down	Relapsed vs. Non-relapsed DUX4 patients	James et al. 2019
RP11-317N8.3	ENSG00000257272	down	Relapsed vs. Non-relapsed DUX4 patients	James et al. 2019
RP11-461L13.5	ENSG00000270883	down	Relapsed vs. Non-relapsed DUX4 patients	James et al. 2019
RP1-187B23.1	ENSG00000233478	down	Relapsed vs. Non-relapsed DUX4 patients	James et al. 2019
IL21-AS1	ENSG00000227145	down	Relapsed vs. Non-relapsed DUX4 patients	James et al. 2019
AC074011.2	ENSG00000230730	down	Relapsed vs. Non-relapsed DUX4 patients	James et al. 2019
AC123886.2	ENSG00000231536	down	Relapsed vs. Non-relapsed DUX4 patients	James et al. 2019
LINC01105	ENSG00000232044	down	Relapsed vs. Non-relapsed DUX4 patients	James et al. 2019
CTD-2315E11.1	ENSG00000259685	down	Relapsed vs. Non-relapsed DUX4 patients	James et al. 2019
RP11-576I22.2	ENSG00000231407	down	Relapsed vs. Non-relapsed DUX4 patients	James et al. 2019
AC073115.6	ENSG00000237471	down	Relapsed vs. Non-relapsed DUX4 patients	James et al. 2019
CTD-2568A17.1	ENSG00000261341	down	Relapsed vs. Non-relapsed DUX4 patients	James et al. 2019
AC007228.9	ENSG00000268568	down	Relapsed vs. Non-relapsed DUX4 patients	James et al. 2019
RP3-467K16.4	ENSG00000228140	down	Relapsed vs. Non-relapsed DUX4 patients	James et al. 2019
SCARNA15	ENSG00000252690	down	Relapsed vs. Non-relapsed DUX4 patients	James et al. 2019
RP11-110H1.4	ENSG00000263916	down	Relapsed vs. Non-relapsed DUX4 patients	James et al. 2019
AC084117.3	ENSG00000256006	down	Relapsed vs. Non-relapsed DUX4 patients	James et al. 2019
LINC00837	ENSG00000235824	down	Relapsed vs. Non-relapsed DUX4 patients	James et al. 2019
RP11-434I12.2	ENSG00000250295	down	Relapsed vs. Non-relapsed DUX4 patients	James et al. 2019
RP11-661O13.1	ENSG00000266708	down	Relapsed vs. Non-relapsed DUX4 patients	James et al. 2019
RP11-347C12.10	ENSG00000260219	down	Relapsed vs. Non-relapsed DUX4 patients	James et al. 2019
AC016747.3	ENSG00000212978	down	Relapsed vs. Non-relapsed DUX4 patients	James et al. 2019
RP11-791G15.2	ENSG00000272275	down	Relapsed vs. Non-relapsed DUX4 patients	James et al. 2019
RP11-568J23.5	ENSG00000270184	down	Relapsed vs. Non-relapsed DUX4 patients	James et al. 2019
RP1-92O14.6	ENSG00000229431	down	Relapsed vs. Non-relapsed DUX4 patients	James et al. 2019
RP11-326C3.2	ENSG00000255026	down	Relapsed vs. Non-relapsed DUX4 patients	James et al. 2019
RP13-638C3.3	ENSG00000262147	down	Relapsed vs. Non-relapsed DUX4 patients	James et al. 2019
RP11-472G21.2	ENSG00000230526	down	Relapsed vs. Non-relapsed DUX4 patients	James et al. 2019
SNHG12	ENSG00000197989	down	Relapsed vs. Non-relapsed DUX4 patients	James et al. 2019
RP11-118B18.1	ENSG00000267659	down	Relapsed vs. Non-relapsed DUX4 patients	James et al. 2019
KMT2E-AS1	ENSG00000239569	up	Relapsed vs. Non-relapsed BCR-ABL like patients	James et al. 2019
RP11-7F18.2	ENSG00000271966	up	Relapsed vs. Non-relapsed BCR-ABL like patients	James et al. 2019
RP11-529H20.5	ENSG00000259634	up	Relapsed vs. Non-relapsed BCR-ABL like patients	James et al. 2019
RP11-353B9.1	ENSG00000261597	up	Relapsed vs. Non-relapsed BCR-ABL like patients	James et al. 2019
RP4-561L24.3	ENSG00000260464	up	Relapsed vs. Non-relapsed BCR-ABL like patients	James et al. 2019
RP5-1065J22.8	ENSG00000273382	up	Relapsed vs. Non-relapsed BCR-ABL like patients	James et al. 2019
RP11-506K6.4	ENSG00000272320	up	Relapsed vs. Non-relapsed BCR-ABL like patients	James et al. 2019
CTD-2620I22.7	ENSG00000268613	up	Relapsed vs. Non-relapsed BCR-ABL like patients	James et al. 2019
RP11-305E6.4	ENSG00000259994	up	Relapsed vs. Non-relapsed BCR-ABL like patients	James et al. 2019
RP11-731F5.2	ENSG00000253364	up	Relapsed vs. Non-relapsed BCR-ABL like patients	James et al. 2019
ARPP21-AS1	ENSG00000230830	up	Relapsed vs. Non-relapsed BCR-ABL like patients	James et al. 2019
XXYLT1-AS2	ENSG00000230266	up	Relapsed vs. Non-relapsed BCR-ABL like patients	James et al. 2019
RP11-466P24.7	ENSG00000266045	up	Relapsed vs. Non-relapsed BCR-ABL like patients	James et al. 2019
RP11-108L7.15	ENSG00000273162	up	Relapsed vs. Non-relapsed BCR-ABL like patients	James et al. 2019
CTD-2223O18.1	ENSG00000258748	up	Relapsed vs. Non-relapsed BCR-ABL like patients	James et al. 2019
DLGAP1-AS2	ENSG00000262001	up	Relapsed vs. Non-relapsed BCR-ABL like patients	James et al. 2019
RP5-1029F21.2	ENSG00000262905	up	Relapsed vs. Non-relapsed BCR-ABL like patients	James et al. 2019
LINC00582	ENSG00000229228	up	Relapsed vs. Non-relapsed BCR-ABL like patients	James et al. 2019
CTD-2256P15.4	ENSG00000271980	up	Relapsed vs. Non-relapsed BCR-ABL like patients	James et al. 2019
RP11-301O19.1	ENSG00000273080	up	Relapsed vs. Non-relapsed BCR-ABL like patients	James et al. 2019
RP11-87C12.5	ENSG00000255856	up	Relapsed vs. Non-relapsed BCR-ABL like patients	James et al. 2019
CTC-451A6.4	ENSG00000180081	up	Relapsed vs. Non-relapsed BCR-ABL like patients	James et al. 2019
RP5-887A10.1	ENSG00000234184	up	Relapsed vs. Non-relapsed BCR-ABL like patients	James et al. 2019
RP11-560J1.2	ENSG00000271888	up	Relapsed vs. Non-relapsed BCR-ABL like patients	James et al. 2019
AC096579.13	ENSG00000240040	up	Relapsed vs. Non-relapsed BCR-ABL like patients	James et al. 2019
RP11-1101H11.1	ENSG00000249849	up	Relapsed vs. Non-relapsed BCR-ABL like patients	James et al. 2019
AC016735.2	ENSG00000231826	up	Relapsed vs. Non-relapsed BCR-ABL like patients	James et al. 2019
AC079767.4	ENSG00000224137	up	Relapsed vs. Non-relapsed BCR-ABL like patients	James et al. 2019
LINC00487	ENSG00000205837	up	Relapsed vs. Non-relapsed BCR-ABL like patients	James et al. 2019
RP11-6N17.2	ENSG00000266821	up	Relapsed vs. Non-relapsed BCR-ABL like patients	James et al. 2019
RP4-555D20.2	ENSG00000261786	up	Relapsed vs. Non-relapsed BCR-ABL like patients	James et al. 2019
DDR1-AS1	ENSG00000237775	up	Relapsed vs. Non-relapsed BCR-ABL like patients	James et al. 2019
RP3-449M8.6	ENSG00000259005	up	Relapsed vs. Non-relapsed BCR-ABL like patients	James et al. 2019
RP11-973H7.1	ENSG00000260302	up	Relapsed vs. Non-relapsed BCR-ABL like patients	James et al. 2019
RP11-466A19.1	ENSG00000266718	up	Relapsed vs. Non-relapsed BCR-ABL like patients	James et al. 2019
RP11-217B1.2	ENSG00000261441	up	Relapsed vs. Non-relapsed BCR-ABL like patients	James et al. 2019
MIR219-2	ENSG00000207955	up	Relapsed vs. Non-relapsed BCR-ABL like patients	James et al. 2019
GS1-166A23.2	ENSG00000272361	up	Relapsed vs. Non-relapsed BCR-ABL like patients	James et al. 2019
CTD-2105E13.15	ENSG00000269275	up	Relapsed vs. Non-relapsed BCR-ABL like patients	James et al. 2019
AC079354.3	ENSG00000222035	up	Relapsed vs. Non-relapsed BCR-ABL like patients	James et al. 2019
RP11-64D24.2	ENSG00000256947	up	Relapsed vs. Non-relapsed BCR-ABL like patients	James et al. 2019
CTB-133G6.2	ENSG00000267852	up	Relapsed vs. Non-relapsed BCR-ABL like patients	James et al. 2019
AP000688.29	ENSG00000233393	up	Relapsed vs. Non-relapsed BCR-ABL like patients	James et al. 2019
AC093375.1	ENSG00000226383	up	Relapsed vs. Non-relapsed BCR-ABL like patients	James et al. 2019
RP11-588H23.3	ENSG00000258168	up	Relapsed vs. Non-relapsed BCR-ABL like patients	James et al. 2019
RP11-444D3.1	ENSG00000255864	up	Relapsed vs. Non-relapsed BCR-ABL like patients	James et al. 2019
CASC8	ENSG00000246228	up	Relapsed vs. Non-relapsed BCR-ABL like patients	James et al. 2019
RP11-705C15.5	ENSG00000272917	up	Relapsed vs. Non-relapsed BCR-ABL like patients	James et al. 2019
AL928768.3	ENSG00000253701	up	Relapsed vs. Non-relapsed BCR-ABL like patients	James et al. 2019
RP11-621L6.3	ENSG00000273321	up	Relapsed vs. Non-relapsed BCR-ABL like patients	James et al. 2019
RP11-1136G11.8	ENSG00000257808	up	Relapsed vs. Non-relapsed BCR-ABL like patients	James et al. 2019
RP11-1252I4.2	ENSG00000250101	up	Relapsed vs. Non-relapsed BCR-ABL like patients	James et al. 2019
RP11-354P11.4	ENSG00000264125	up	Relapsed vs. Non-relapsed BCR-ABL like patients	James et al. 2019
RP11-85B7.2	ENSG00000262966	up	Relapsed vs. Non-relapsed BCR-ABL like patients	James et al. 2019
RP11-214K3.20	ENSG00000269938	up	Relapsed vs. Non-relapsed BCR-ABL like patients	James et al. 2019
RP11-775D22.2	ENSG00000229196	up	Relapsed vs. Non-relapsed BCR-ABL like patients	James et al. 2019
RP11-10L7.1	ENSG00000246375	up	Relapsed vs. Non-relapsed BCR-ABL like patients	James et al. 2019
RP11-654D12.3	ENSG00000257725	up	Relapsed vs. Non-relapsed BCR-ABL like patients	James et al. 2019
CTB-134F13.1	ENSG00000260545	up	Relapsed vs. Non-relapsed BCR-ABL like patients	James et al. 2019
RP11-1152H14.1	ENSG00000271320	up	Relapsed vs. Non-relapsed BCR-ABL like patients	James et al. 2019
CTC-379B2.4	ENSG00000267557	up	Relapsed vs. Non-relapsed BCR-ABL like patients	James et al. 2019
RP5-1096D14.6	ENSG00000203593	up	Relapsed vs. Non-relapsed BCR-ABL like patients	James et al. 2019
PLAC4	ENSG00000225745	up	Relapsed vs. Non-relapsed BCR-ABL like patients	James et al. 2019
DHRSX-IT1	ENSG00000223571	up	Relapsed vs. Non-relapsed BCR-ABL like patients	James et al. 2019
CYP4F35P	ENSG00000265787	up	Relapsed vs. Non-relapsed BCR-ABL like patients	James et al. 2019
AC005304.1	ENSG00000233852	up	Relapsed vs. Non-relapsed BCR-ABL like patients	James et al. 2019
RP4-799P18.2	ENSG00000233332	up	Relapsed vs. Non-relapsed BCR-ABL like patients	James et al. 2019
LINC00284	ENSG00000233725	up	Relapsed vs. Non-relapsed BCR-ABL like patients	James et al. 2019
RP11-1026M7.3	ENSG00000248943	up	Relapsed vs. Non-relapsed BCR-ABL like patients	James et al. 2019
OSBPL10-AS1	ENSG00000232490	up	Relapsed vs. Non-relapsed BCR-ABL like patients	James et al. 2019
CTD-2523D13.2	ENSG00000254854	up	Relapsed vs. Non-relapsed BCR-ABL like patients	James et al. 2019
RP11-973D8.4	ENSG00000258554	up	Relapsed vs. Non-relapsed BCR-ABL like patients	James et al. 2019
LINC00637	ENSG00000258735	up	Relapsed vs. Non-relapsed BCR-ABL like patients	James et al. 2019
RP13-820C6.2	ENSG00000257000	up	Relapsed vs. Non-relapsed BCR-ABL like patients	James et al. 2019
CTD-3193O13.8	ENSG00000269139	up	Relapsed vs. Non-relapsed BCR-ABL like patients	James et al. 2019
RP11-20G13.1	ENSG00000259341	up	Relapsed vs. Non-relapsed BCR-ABL like patients	James et al. 2019
AP001062.8	ENSG00000241728	up	Relapsed vs. Non-relapsed BCR-ABL like patients	James et al. 2019
RP11-607P23.1	ENSG00000271065	up	Relapsed vs. Non-relapsed BCR-ABL like patients	James et al. 2019
AC007879.4	ENSG00000225916	up	Relapsed vs. Non-relapsed BCR-ABL like patients	James et al. 2019
CTC-499B15.8	ENSG00000267089	up	Relapsed vs. Non-relapsed BCR-ABL like patients	James et al. 2019
RP11-617D20.2	ENSG00000271958	up	Relapsed vs. Non-relapsed BCR-ABL like patients	James et al. 2019
RP11-104L21.3	ENSG00000273160	up	Relapsed vs. Non-relapsed BCR-ABL like patients	James et al. 2019
AC005682.8	ENSG00000235664	up	Relapsed vs. Non-relapsed BCR-ABL like patients	James et al. 2019
RP11-64D24.4	ENSG00000256195	up	Relapsed vs. Non-relapsed BCR-ABL like patients	James et al. 2019
RP11-277L2.4	ENSG00000268544	up	Relapsed vs. Non-relapsed BCR-ABL like patients	James et al. 2019
AC005009.2	ENSG00000233073	up	Relapsed vs. Non-relapsed BCR-ABL like patients	James et al. 2019
AC073842.19	ENSG00000235077	up	Relapsed vs. Non-relapsed BCR-ABL like patients	James et al. 2019
RP11-703M24.5	ENSG00000266049	up	Relapsed vs. Non-relapsed BCR-ABL like patients	James et al. 2019
RP11-480D4.1	ENSG00000245729	up	Relapsed vs. Non-relapsed BCR-ABL like patients	James et al. 2019
CTB-55O6.4	ENSG00000267670	up	Relapsed vs. Non-relapsed BCR-ABL like patients	James et al. 2019
AC015691.13	ENSG00000239920	up	Relapsed vs. Non-relapsed BCR-ABL like patients	James et al. 2019
RP11-692P14.1	ENSG00000230394	up	Relapsed vs. Non-relapsed BCR-ABL like patients	James et al. 2019
RP11-124N14.3	ENSG00000234961	up	Relapsed vs. Non-relapsed BCR-ABL like patients	James et al. 2019
CBR3-AS1	ENSG00000236830	up	Relapsed vs. Non-relapsed BCR-ABL like patients	James et al. 2019
RP11-420G6.4	ENSG00000230438	up	Relapsed vs. Non-relapsed BCR-ABL like patients	James et al. 2019
LHFPL3-AS1	ENSG00000226869	up	Relapsed vs. Non-relapsed BCR-ABL like patients	James et al. 2019
RP11-761N21.1	ENSG00000231873	up	Relapsed vs. Non-relapsed BCR-ABL like patients	James et al. 2019
RP5-1139I1.1	ENSG00000230392	up	Relapsed vs. Non-relapsed BCR-ABL like patients	James et al. 2019
SNHG3	ENSG00000242125	up	Relapsed vs. Non-relapsed BCR-ABL like patients	James et al. 2019
CTD-2650P22.1	ENSG00000259438	down	Relapsed vs. Non-relapsed BCR-ABL like patients	James et al. 2019
LINC01107	ENSG00000225493	down	Relapsed vs. Non-relapsed BCR-ABL like patients	James et al. 2019
RP11-1084A12.2	ENSG00000259468	down	Relapsed vs. Non-relapsed BCR-ABL like patients	James et al. 2019
RP11-502N13.2	ENSG00000255649	down	Relapsed vs. Non-relapsed BCR-ABL like patients	James et al. 2019
MIR17HG	ENSG00000215417	down	Relapsed vs. Non-relapsed BCR-ABL like patients	James et al. 2019
RP11-61I13.3	ENSG00000235033	down	Relapsed vs. Non-relapsed BCR-ABL like patients	James et al. 2019
CTD-2527I21.4	ENSG00000221857	down	Relapsed vs. Non-relapsed BCR-ABL like patients	James et al. 2019
RP11-93B14.4	ENSG00000223669	down	Relapsed vs. Non-relapsed BCR-ABL like patients	James et al. 2019
RP11-34F13.2	ENSG00000245719	down	Relapsed vs. Non-relapsed BCR-ABL like patients	James et al. 2019
RP11-325K4.3	ENSG00000261270	down	Relapsed vs. Non-relapsed BCR-ABL like patients	James et al. 2019
RP11-800A3.4	ENSG00000260401	down	Relapsed vs. Non-relapsed BCR-ABL like patients	James et al. 2019
RP11-419K12.1	ENSG00000254223	down	Relapsed vs. Non-relapsed BCR-ABL like patients	James et al. 2019
CTD-2636A23.2	ENSG00000261604	down	Relapsed vs. Non-relapsed BCR-ABL like patients	James et al. 2019
RP1-265C24.8	ENSG00000261839	down	Relapsed vs. Non-relapsed BCR-ABL like patients	James et al. 2019
RP11-573D15.9	ENSG00000263826	up	Relapsed vs. Non-relapsed HH patients	James et al. 2019
RP11-513G11.2	ENSG00000228271	up	Relapsed vs. Non-relapsed HH patients	James et al. 2019
AC019118.2	ENSG00000234423	up	Relapsed vs. Non-relapsed HH patients	James et al. 2019
LY86-AS1	ENSG00000216863	up	Relapsed vs. Non-relapsed HH patients	James et al. 2019
AC003090.1	ENSG00000223561	up	Relapsed vs. Non-relapsed HH patients	James et al. 2019
LINC00887	ENSG00000214145	up	Relapsed vs. Non-relapsed HH patients	James et al. 2019
RP11-693J15.5	ENSG00000205056	up	Relapsed vs. Non-relapsed HH patients	James et al. 2019
CTD-2131I18.1	ENSG00000249073	up	Relapsed vs. Non-relapsed HH patients	James et al. 2019
RP11-553L6.2	ENSG00000241490	up	Relapsed vs. Non-relapsed HH patients	James et al. 2019
RP11-227G15.8	ENSG00000266385	up	Relapsed vs. Non-relapsed HH patients	James et al. 2019
SLC25A5-AS1	ENSG00000224281	up	Relapsed vs. Non-relapsed HH patients	James et al. 2019
LINC00494	ENSG00000235621	up	Relapsed vs. Non-relapsed HH patients	James et al. 2019
RP1-45N11.1	ENSG00000260271	up	Relapsed vs. Non-relapsed HH patients	James et al. 2019
RP1-151B14.6	ENSG00000235237	up	Relapsed vs. Non-relapsed HH patients	James et al. 2019
AP000688.29	ENSG00000233393	up	Relapsed vs. Non-relapsed HH patients	James et al. 2019
RP11-433A10.2	ENSG00000242618	up	Relapsed vs. Non-relapsed HH patients	James et al. 2019
RGMB-AS1	ENSG00000246763	up	Relapsed vs. Non-relapsed HH patients	James et al. 2019
CTD-2509G16.5	ENSG00000258760	up	Relapsed vs. Non-relapsed HH patients	James et al. 2019
RP11-1105O14.1	ENSG00000253270	up	Relapsed vs. Non-relapsed HH patients	James et al. 2019
RP11-574F11.3	ENSG00000231509	up	Relapsed vs. Non-relapsed HH patients	James et al. 2019
RP11-563M4.1	ENSG00000249752	up	Relapsed vs. Non-relapsed HH patients	James et al. 2019
CTB-49A3.2	ENSG00000248245	up	Relapsed vs. Non-relapsed HH patients	James et al. 2019
RP11-347C18.3	ENSG00000253878	up	Relapsed vs. Non-relapsed HH patients	James et al. 2019
RP11-135J2.3	ENSG00000223842	up	Relapsed vs. Non-relapsed HH patients	James et al. 2019
RP11-355N15.1	ENSG00000259293	up	Relapsed vs. Non-relapsed HH patients	James et al. 2019
RP11-691H4.3	ENSG00000267393	up	Relapsed vs. Non-relapsed HH patients	James et al. 2019
RP11-87G24.6	ENSG00000267521	up	Relapsed vs. Non-relapsed HH patients	James et al. 2019
RP3-414A15.2	ENSG00000258695	up	Relapsed vs. Non-relapsed HH patients	James et al. 2019
AC079767.4	ENSG00000224137	up	Relapsed vs. Non-relapsed HH patients	James et al. 2019
RP11-533O20.2	ENSG00000223946	up	Relapsed vs. Non-relapsed HH patients	James et al. 2019
CTD-2281E23.2	ENSG00000254269	up	Relapsed vs. Non-relapsed HH patients	James et al. 2019
CTB-181H17.1	ENSG00000272219	up	Relapsed vs. Non-relapsed HH patients	James et al. 2019
RP11-982M15.8	ENSG00000260792	up	Relapsed vs. Non-relapsed HH patients	James et al. 2019
RP11-567C2.1	ENSG00000257194	up	Relapsed vs. Non-relapsed HH patients	James et al. 2019
RP11-700H6.4	ENSG00000262006	up	Relapsed vs. Non-relapsed HH patients	James et al. 2019
RP11-52J3.3	ENSG00000234361	up	Relapsed vs. Non-relapsed HH patients	James et al. 2019
CTC-281F24.1	ENSG00000261996	up	Relapsed vs. Non-relapsed HH patients	James et al. 2019
RP11-297B17.3	ENSG00000250850	up	Relapsed vs. Non-relapsed HH patients	James et al. 2019
AP001042.1	ENSG00000229986	up	Relapsed vs. Non-relapsed HH patients	James et al. 2019
RP11-305L7.3	ENSG00000237422	up	Relapsed vs. Non-relapsed HH patients	James et al. 2019
RP11-968O1.5	ENSG00000256139	up	Relapsed vs. Non-relapsed HH patients	James et al. 2019
RP11-521D12.5	ENSG00000243491	up	Relapsed vs. Non-relapsed HH patients	James et al. 2019
HPN-AS1	ENSG00000227392	up	Relapsed vs. Non-relapsed HH patients	James et al. 2019
RP11-265P11.1	ENSG00000224610	up	Relapsed vs. Non-relapsed HH patients	James et al. 2019
IFNG-AS1	ENSG00000255733	up	Relapsed vs. Non-relapsed HH patients	James et al. 2019
AC019118.3	ENSG00000236760	up	Relapsed vs. Non-relapsed HH patients	James et al. 2019
AC025165.8	ENSG00000224713	up	Relapsed vs. Non-relapsed HH patients	James et al. 2019
LA16c-306A4.1	ENSG00000260022	up	Relapsed vs. Non-relapsed HH patients	James et al. 2019
LINC00868	ENSG00000267535	up	Relapsed vs. Non-relapsed HH patients	James et al. 2019
RP11-395D3.1	ENSG00000232211	up	Relapsed vs. Non-relapsed HH patients	James et al. 2019
RP11-596D21.1	ENSG00000257831	up	Relapsed vs. Non-relapsed HH patients	James et al. 2019
RP11-154D17.1	ENSG00000233926	up	Relapsed vs. Non-relapsed HH patients	James et al. 2019
RP11-430B1.2	ENSG00000259577	up	Relapsed vs. Non-relapsed HH patients	James et al. 2019
CTD-2196E14.9	ENSG00000260482	up	Relapsed vs. Non-relapsed HH patients	James et al. 2019
CTD-2281E23.1	ENSG00000253640	up	Relapsed vs. Non-relapsed HH patients	James et al. 2019
ZNF205-AS1	ENSG00000263214	up	Relapsed vs. Non-relapsed HH patients	James et al. 2019
CTD-3001H11.1	ENSG00000269806	up	Relapsed vs. Non-relapsed HH patients	James et al. 2019
HS1BP3-IT1	ENSG00000231948	up	Relapsed vs. Non-relapsed HH patients	James et al. 2019
RP11-342A1.1	ENSG00000250252	up	Relapsed vs. Non-relapsed HH patients	James et al. 2019
AC016907.3	ENSG00000233862	up	Relapsed vs. Non-relapsed HH patients	James et al. 2019
RP11-728K20.2	ENSG00000260555	up	Relapsed vs. Non-relapsed HH patients	James et al. 2019
RP11-302F12.10	ENSG00000250541	up	Relapsed vs. Non-relapsed HH patients	James et al. 2019
CTD-2366F13.2	ENSG00000272123	up	Relapsed vs. Non-relapsed HH patients	James et al. 2019
AC009970.1	ENSG00000233953	up	Relapsed vs. Non-relapsed HH patients	James et al. 2019
RP11-7F17.3	ENSG00000258819	up	Relapsed vs. Non-relapsed HH patients	James et al. 2019
RP11-682N22.1	ENSG00000272377	up	Relapsed vs. Non-relapsed HH patients	James et al. 2019
RP11-834C11.10	ENSG00000257534	up	Relapsed vs. Non-relapsed HH patients	James et al. 2019
RP11-794A8.1	ENSG00000258753	up	Relapsed vs. Non-relapsed HH patients	James et al. 2019
RP11-227G15.9	ENSG00000264083	up	Relapsed vs. Non-relapsed HH patients	James et al. 2019
RP11-31F15.2	ENSG00000238198	up	Relapsed vs. Non-relapsed HH patients	James et al. 2019
RP11-834C11.3	ENSG00000248265	up	Relapsed vs. Non-relapsed HH patients	James et al. 2019
TCEAL3-AS1	ENSG00000224031	up	Relapsed vs. Non-relapsed HH patients	James et al. 2019
RP11-662J14.2	ENSG00000258480	up	Relapsed vs. Non-relapsed HH patients	James et al. 2019
CTB-49A3.5	ENSG00000249478	up	Relapsed vs. Non-relapsed HH patients	James et al. 2019
RP11-689B22.2	ENSG00000257221	up	Relapsed vs. Non-relapsed HH patients	James et al. 2019
TAPT1-AS1	ENSG00000263327	up	Relapsed vs. Non-relapsed HH patients	James et al. 2019
LINC00208	ENSG00000170983	up	Relapsed vs. Non-relapsed HH patients	James et al. 2019
RP11-53B2.3	ENSG00000267136	up	Relapsed vs. Non-relapsed HH patients	James et al. 2019
OSBPL10-AS1	ENSG00000232490	up	Relapsed vs. Non-relapsed HH patients	James et al. 2019
RP11-234B24.4	ENSG00000256988	up	Relapsed vs. Non-relapsed HH patients	James et al. 2019
AC016910.1	ENSG00000232377	up	Relapsed vs. Non-relapsed HH patients	James et al. 2019
RP11-461L13.4	ENSG00000270302	up	Relapsed vs. Non-relapsed HH patients	James et al. 2019
LENG8-AS1	ENSG00000226696	up	Relapsed vs. Non-relapsed HH patients	James et al. 2019
RP11-53O19.1	ENSG00000251141	up	Relapsed vs. Non-relapsed HH patients	James et al. 2019
LINC00114	ENSG00000223806	up	Relapsed vs. Non-relapsed HH patients	James et al. 2019
CTB-27N1.1	ENSG00000249601	up	Relapsed vs. Non-relapsed HH patients	James et al. 2019
LDLRAD4-AS1	ENSG00000267690	up	Relapsed vs. Non-relapsed HH patients	James et al. 2019
RP1-63G5.5	ENSG00000243902	up	Relapsed vs. Non-relapsed HH patients	James et al. 2019
RP11-219B4.7	ENSG00000260493	up	Relapsed vs. Non-relapsed HH patients	James et al. 2019
LL22NC03-2H8.4	ENSG00000234630	up	Relapsed vs. Non-relapsed HH patients	James et al. 2019
AC018359.1	ENSG00000226320	up	Relapsed vs. Non-relapsed HH patients	James et al. 2019
LARGE-AS1	ENSG00000224973	up	Relapsed vs. Non-relapsed HH patients	James et al. 2019
RP5-1050D4.2	ENSG00000234203	up	Relapsed vs. Non-relapsed HH patients	James et al. 2019
RP11-13J8.1	ENSG00000232719	up	Relapsed vs. Non-relapsed HH patients	James et al. 2019
CTB-186G2.1	ENSG00000267291	up	Relapsed vs. Non-relapsed HH patients	James et al. 2019
RP11-24I21.1	ENSG00000248210	up	Relapsed vs. Non-relapsed HH patients	James et al. 2019
RP11-517C16.4	ENSG00000261243	up	Relapsed vs. Non-relapsed HH patients	James et al. 2019
AC073316.1	ENSG00000236708	up	Relapsed vs. Non-relapsed HH patients	James et al. 2019
U62631.5	ENSG00000269553	up	Relapsed vs. Non-relapsed HH patients	James et al. 2019
ZEB1-AS1	ENSG00000237036	up	Relapsed vs. Non-relapsed HH patients	James et al. 2019
RP11-281O15.4	ENSG00000254035	up	Relapsed vs. Non-relapsed HH patients	James et al. 2019
CTD-2023N9.2	ENSG00000248294	up	Relapsed vs. Non-relapsed HH patients	James et al. 2019
AC005606.15	ENSG00000260107	up	Relapsed vs. Non-relapsed HH patients	James et al. 2019
RP11-484L8.1	ENSG00000267764	up	Relapsed vs. Non-relapsed HH patients	James et al. 2019
RP11-58G13.1	ENSG00000267039	up	Relapsed vs. Non-relapsed HH patients	James et al. 2019
AC007879.4	ENSG00000225916	up	Relapsed vs. Non-relapsed HH patients	James et al. 2019
RP11-113K21.4	ENSG00000255503	up	Relapsed vs. Non-relapsed HH patients	James et al. 2019
RP11-319G9.3	ENSG00000260816	up	Relapsed vs. Non-relapsed HH patients	James et al. 2019
RP11-264C15.2	ENSG00000229105	up	Relapsed vs. Non-relapsed HH patients	James et al. 2019
AC098820.3	ENSG00000232485	up	Relapsed vs. Non-relapsed HH patients	James et al. 2019
RP11-298J23.5	ENSG00000231102	up	Relapsed vs. Non-relapsed HH patients	James et al. 2019
RP3-323N1.2	ENSG00000230322	up	Relapsed vs. Non-relapsed HH patients	James et al. 2019
AC133785.1	ENSG00000233221	up	Relapsed vs. Non-relapsed HH patients	James et al. 2019
CTD-3037G24.4	ENSG00000259876	up	Relapsed vs. Non-relapsed HH patients	James et al. 2019
SMAD1-AS2	ENSG00000250582	up	Relapsed vs. Non-relapsed HH patients	James et al. 2019
RP11-876N24.2	ENSG00000262151	up	Relapsed vs. Non-relapsed HH patients	James et al. 2019
RP11-335I12.2	ENSG00000256072	up	Relapsed vs. Non-relapsed HH patients	James et al. 2019
RP11-52J3.2	ENSG00000229502	up	Relapsed vs. Non-relapsed HH patients	James et al. 2019
RPS6KA2-AS1	ENSG00000231654	up	Relapsed vs. Non-relapsed HH patients	James et al. 2019
AP001626.1	ENSG00000225431	up	Relapsed vs. Non-relapsed HH patients	James et al. 2019
RP11-148O21.2	ENSG00000255354	up	Relapsed vs. Non-relapsed HH patients	James et al. 2019
RP11-148O21.4	ENSG00000255518	up	Relapsed vs. Non-relapsed HH patients	James et al. 2019
RP13-941N14.1	ENSG00000256742	up	Relapsed vs. Non-relapsed HH patients	James et al. 2019
RP11-554A11.9	ENSG00000259799	up	Relapsed vs. Non-relapsed HH patients	James et al. 2019
RP11-796E2.4	ENSG00000245904	up	Relapsed vs. Non-relapsed HH patients	James et al. 2019
RP11-10N23.2	ENSG00000253854	up	Relapsed vs. Non-relapsed HH patients	James et al. 2019
CTD-2555K7.2	ENSG00000258458	up	Relapsed vs. Non-relapsed HH patients	James et al. 2019
SIAH2-AS1	ENSG00000244265	up	Relapsed vs. Non-relapsed HH patients	James et al. 2019
RP1-29C18.10	ENSG00000212939	up	Relapsed vs. Non-relapsed HH patients	James et al. 2019
CTD-3162L10.3	ENSG00000266973	up	Relapsed vs. Non-relapsed HH patients	James et al. 2019
RP11-445H22.3	ENSG00000132832	up	Relapsed vs. Non-relapsed HH patients	James et al. 2019
RP11-123O10.3	ENSG00000257083	up	Relapsed vs. Non-relapsed HH patients	James et al. 2019
CTC-425O23.2	ENSG00000205041	up	Relapsed vs. Non-relapsed HH patients	James et al. 2019
RP11-473M20.11	ENSG00000263011	up	Relapsed vs. Non-relapsed HH patients	James et al. 2019
RP11-465B22.8	ENSG00000272141	up	Relapsed vs. Non-relapsed HH patients	James et al. 2019
RP11-885B4.2	ENSG00000255669	up	Relapsed vs. Non-relapsed HH patients	James et al. 2019
CTC-248O19.1	ENSG00000253653	up	Relapsed vs. Non-relapsed HH patients	James et al. 2019
AC078852.1	ENSG00000254094	up	Relapsed vs. Non-relapsed HH patients	James et al. 2019
AC013436.6	ENSG00000228596	up	Relapsed vs. Non-relapsed HH patients	James et al. 2019
RP11-75C10.9	ENSG00000267016	up	Relapsed vs. Non-relapsed HH patients	James et al. 2019
RP11-123O10.4	ENSG00000256248	up	Relapsed vs. Non-relapsed HH patients	James et al. 2019
RP5-1085F17.4	ENSG00000260536	up	Relapsed vs. Non-relapsed HH patients	James et al. 2019
EIF1AX-AS1	ENSG00000225037	up	Relapsed vs. Non-relapsed HH patients	James et al. 2019
EZR-AS1	ENSG00000233893	up	Relapsed vs. Non-relapsed HH patients	James et al. 2019
RP5-888M10.2	ENSG00000229484	up	Relapsed vs. Non-relapsed HH patients	James et al. 2019
CTD-3060P21.1	ENSG00000262884	up	Relapsed vs. Non-relapsed HH patients	James et al. 2019
RP11-430C7.4	ENSG00000240710	up	Relapsed vs. Non-relapsed HH patients	James et al. 2019
CTB-134F13.1	ENSG00000260545	up	Relapsed vs. Non-relapsed HH patients	James et al. 2019
AC135050.5	ENSG00000261124	up	Relapsed vs. Non-relapsed HH patients	James et al. 2019
RP11-575L7.2	ENSG00000226877	up	Relapsed vs. Non-relapsed HH patients	James et al. 2019
AC087294.2	ENSG00000235530	up	Relapsed vs. Non-relapsed HH patients	James et al. 2019
VIPR1-AS1	ENSG00000232354	up	Relapsed vs. Non-relapsed HH patients	James et al. 2019
XXYLT1-AS2	ENSG00000230266	up	Relapsed vs. Non-relapsed HH patients	James et al. 2019
CTD-2021J15.1	ENSG00000239462	up	Relapsed vs. Non-relapsed HH patients	James et al. 2019
AP001058.3	ENSG00000232698	up	Relapsed vs. Non-relapsed HH patients	James et al. 2019
RP5-943J3.1	ENSG00000231613	up	Relapsed vs. Non-relapsed HH patients	James et al. 2019
RP11-685M7.3	ENSG00000246308	up	Relapsed vs. Non-relapsed HH patients	James et al. 2019
RP11-90K6.1	ENSG00000239482	up	Relapsed vs. Non-relapsed HH patients	James et al. 2019
RP11-452H21.2	ENSG00000254649	up	Relapsed vs. Non-relapsed HH patients	James et al. 2019
RP11-576N17.5	ENSG00000250057	up	Relapsed vs. Non-relapsed HH patients	James et al. 2019
U51244.2	ENSG00000228481	up	Relapsed vs. Non-relapsed HH patients	James et al. 2019
LA16c-312E8.2	ENSG00000260132	up	Relapsed vs. Non-relapsed HH patients	James et al. 2019
ZNRD1-AS1	ENSG00000204623	up	Relapsed vs. Non-relapsed HH patients	James et al. 2019
SDCBP2-AS1	ENSG00000234684	up	Relapsed vs. Non-relapsed HH patients	James et al. 2019
RP11-326J18.1	ENSG00000241596	up	Relapsed vs. Non-relapsed HH patients	James et al. 2019
RP11-1079K10.3	ENSG00000248714	up	Relapsed vs. Non-relapsed HH patients	James et al. 2019
GRIFIN	ENSG00000236734	up	Relapsed vs. Non-relapsed HH patients	James et al. 2019
MIR146A	ENSG00000253522	up	Relapsed vs. Non-relapsed HH patients	James et al. 2019
RP11-484D2.5	ENSG00000255340	up	Relapsed vs. Non-relapsed HH patients	James et al. 2019
LINC00910	ENSG00000188825	up	Relapsed vs. Non-relapsed HH patients	James et al. 2019
RP13-36G14.4	ENSG00000270223	up	Relapsed vs. Non-relapsed HH patients	James et al. 2019
DDR1-AS1	ENSG00000237775	up	Relapsed vs. Non-relapsed HH patients	James et al. 2019
RP11-1080G15.1	ENSG00000253557	up	Relapsed vs. Non-relapsed HH patients	James et al. 2019
RP11-563E2.2	ENSG00000250027	up	Relapsed vs. Non-relapsed HH patients	James et al. 2019
SCARNA17	ENSG00000267322	up	Relapsed vs. Non-relapsed HH patients	James et al. 2019
RP11-318K15.2	ENSG00000254325	up	Relapsed vs. Non-relapsed HH patients	James et al. 2019
RAD51-AS1	ENSG00000245849	up	Relapsed vs. Non-relapsed HH patients	James et al. 2019
RP11-32B11.2	ENSG00000230940	up	Relapsed vs. Non-relapsed HH patients	James et al. 2019
AP006621.6	ENSG00000255142	up	Relapsed vs. Non-relapsed HH patients	James et al. 2019
RP11-420G6.4	ENSG00000230438	up	Relapsed vs. Non-relapsed HH patients	James et al. 2019
RP11-392O1.4	ENSG00000267747	up	Relapsed vs. Non-relapsed HH patients	James et al. 2019
CTD-2245F17.3	ENSG00000269051	up	Relapsed vs. Non-relapsed HH patients	James et al. 2019
CTC-338M12.6	ENSG00000250900	up	Relapsed vs. Non-relapsed HH patients	James et al. 2019
RP13-225O21.2	ENSG00000228487	up	Relapsed vs. Non-relapsed HH patients	James et al. 2019
FAM53B-AS1	ENSG00000233334	up	Relapsed vs. Non-relapsed HH patients	James et al. 2019
RP11-96C23.9	ENSG00000237280	up	Relapsed vs. Non-relapsed HH patients	James et al. 2019
RP11-235E17.6	ENSG00000262903	up	Relapsed vs. Non-relapsed HH patients	James et al. 2019
RP11-273B20.1	ENSG00000256967	up	Relapsed vs. Non-relapsed HH patients	James et al. 2019
RP11-484N16.1	ENSG00000266304	up	Relapsed vs. Non-relapsed HH patients	James et al. 2019
RP13-216E22.5	ENSG00000271199	up	Relapsed vs. Non-relapsed HH patients	James et al. 2019
AC012358.7	ENSG00000203327	up	Relapsed vs. Non-relapsed HH patients	James et al. 2019
RP11-326C3.10	ENSG00000255089	up	Relapsed vs. Non-relapsed HH patients	James et al. 2019
RP11-331F9.3	ENSG00000231393	up	Relapsed vs. Non-relapsed HH patients	James et al. 2019
CTD-2201I18.1	ENSG00000249825	up	Relapsed vs. Non-relapsed HH patients	James et al. 2019
RP11-481C4.1	ENSG00000249870	up	Relapsed vs. Non-relapsed HH patients	James et al. 2019
AC093732.1	ENSG00000233845	up	Relapsed vs. Non-relapsed HH patients	James et al. 2019
AC009120.5	ENSG00000260884	up	Relapsed vs. Non-relapsed HH patients	James et al. 2019
ELMO1-AS1	ENSG00000224101	up	Relapsed vs. Non-relapsed HH patients	James et al. 2019
RP5-1125A11.4	ENSG00000228386	up	Relapsed vs. Non-relapsed HH patients	James et al. 2019
RP11-402G3.5	ENSG00000230054	up	Relapsed vs. Non-relapsed HH patients	James et al. 2019
RHOA-IT1	ENSG00000235908	up	Relapsed vs. Non-relapsed HH patients	James et al. 2019
RP11-53B2.1	ENSG00000267529	up	Relapsed vs. Non-relapsed HH patients	James et al. 2019
RP11-473O4.3	ENSG00000253720	up	Relapsed vs. Non-relapsed HH patients	James et al. 2019
FTX	ENSG00000230590	up	Relapsed vs. Non-relapsed HH patients	James et al. 2019
MORF4L2-AS1	ENSG00000231154	up	Relapsed vs. Non-relapsed HH patients	James et al. 2019
AC002117.1	ENSG00000224505	up	Relapsed vs. Non-relapsed HH patients	James et al. 2019
RP11-326C3.7	ENSG00000254910	up	Relapsed vs. Non-relapsed HH patients	James et al. 2019
LINC00854	ENSG00000236383	up	Relapsed vs. Non-relapsed HH patients	James et al. 2019
CTD-2525I3.6	ENSG00000269535	up	Relapsed vs. Non-relapsed HH patients	James et al. 2019
AP001630.5	ENSG00000224100	up	Relapsed vs. Non-relapsed HH patients	James et al. 2019
RP11-82O19.1	ENSG00000263657	up	Relapsed vs. Non-relapsed HH patients	James et al. 2019
RP11-16E12.1	ENSG00000259448	up	Relapsed vs. Non-relapsed HH patients	James et al. 2019
CTD-3110H11.1	ENSG00000259715	up	Relapsed vs. Non-relapsed HH patients	James et al. 2019
RP11-1149M10.1	ENSG00000254177	up	Relapsed vs. Non-relapsed HH patients	James et al. 2019
RP11-798G7.7	ENSG00000267246	up	Relapsed vs. Non-relapsed HH patients	James et al. 2019
CTC-429P9.5	ENSG00000267904	up	Relapsed vs. Non-relapsed HH patients	James et al. 2019
CDC42-IT1	ENSG00000230068	up	Relapsed vs. Non-relapsed HH patients	James et al. 2019
LINC00926	ENSG00000247982	up	Relapsed vs. Non-relapsed HH patients	James et al. 2019
RNF216-IT1	ENSG00000237738	up	Relapsed vs. Non-relapsed HH patients	James et al. 2019
RP11-666A8.8	ENSG00000267546	up	Relapsed vs. Non-relapsed HH patients	James et al. 2019
RP11-228B15.4	ENSG00000225032	up	Relapsed vs. Non-relapsed HH patients	James et al. 2019
AD000684.2	ENSG00000268947	up	Relapsed vs. Non-relapsed HH patients	James et al. 2019
SPTY2D1-AS1	ENSG00000247595	up	Relapsed vs. Non-relapsed HH patients	James et al. 2019
AC009950.2	ENSG00000225963	up	Relapsed vs. Non-relapsed HH patients	James et al. 2019
UGDH-AS1	ENSG00000249348	up	Relapsed vs. Non-relapsed HH patients	James et al. 2019
RP11-440L14.1	ENSG00000249592	up	Relapsed vs. Non-relapsed HH patients	James et al. 2019
LINC00384	ENSG00000232117	up	Relapsed vs. Non-relapsed HH patients	James et al. 2019
RP11-671J11.6	ENSG00000258612	up	Relapsed vs. Non-relapsed HH patients	James et al. 2019
RP13-766D20.2	ENSG00000229848	up	Relapsed vs. Non-relapsed HH patients	James et al. 2019
KLF7-IT1	ENSG00000237892	up	Relapsed vs. Non-relapsed HH patients	James et al. 2019
AC007566.10	ENSG00000244055	up	Relapsed vs. Non-relapsed HH patients	James et al. 2019
RP11-244H3.1	ENSG00000241014	up	Relapsed vs. Non-relapsed HH patients	James et al. 2019
FAM211A-AS1	ENSG00000175061	down	Relapsed vs. Non-relapsed HH patients	James et al. 2019
RP1-202O8.3	ENSG00000271746	down	Relapsed vs. Non-relapsed HH patients	James et al. 2019
RP11-157E21.1	ENSG00000253593	down	Relapsed vs. Non-relapsed HH patients	James et al. 2019
RP11-701P16.5	ENSG00000251230	down	Relapsed vs. Non-relapsed HH patients	James et al. 2019
AIRN	ENSG00000268257	down	Relapsed vs. Non-relapsed HH patients	James et al. 2019
RP11-713M15.2	ENSG00000272502	down	Relapsed vs. Non-relapsed HH patients	James et al. 2019
AP001597.1	ENSG00000197934	down	Relapsed vs. Non-relapsed HH patients	James et al. 2019
RMRP	ENSG00000269900	down	Relapsed vs. Non-relapsed HH patients	James et al. 2019
RP11-767C1.2	ENSG00000272263	down	Relapsed vs. Non-relapsed HH patients	James et al. 2019
ST7-AS1	ENSG00000227199	down	Relapsed vs. Non-relapsed HH patients	James et al. 2019
AC017002.2	ENSG00000224959	down	Relapsed vs. Non-relapsed HH patients	James et al. 2019
AC002511.2	ENSG00000233214	down	Relapsed vs. Non-relapsed HH patients	James et al. 2019
RP11-1275H24.1	ENSG00000234432	down	Relapsed vs. Non-relapsed HH patients	James et al. 2019
RP11-419K12.1	ENSG00000254223	down	Relapsed vs. Non-relapsed HH patients	James et al. 2019
RP11-244F12.3	ENSG00000259498	down	Relapsed vs. Non-relapsed HH patients	James et al. 2019
RP11-15I11.2	ENSG00000229983	down	Relapsed vs. Non-relapsed HH patients	James et al. 2019
RP1-153G14.4	ENSG00000271755	down	Relapsed vs. Non-relapsed HH patients	James et al. 2019
MIR503HG	ENSG00000223749	down	Relapsed vs. Non-relapsed HH patients	James et al. 2019
RP11-533E19.7	ENSG00000272906	down	Relapsed vs. Non-relapsed HH patients	James et al. 2019
RP11-97O12.6	ENSG00000271997	down	Relapsed vs. Non-relapsed HH patients	James et al. 2019
RP11-53O19.3	ENSG00000272335	down	Relapsed vs. Non-relapsed HH patients	James et al. 2019
RP11-521I2.3	ENSG00000260368	down	Relapsed vs. Non-relapsed HH patients	James et al. 2019
CTA-445C9.14	ENSG00000261188	down	Relapsed vs. Non-relapsed HH patients	James et al. 2019
MBNL1-AS1	ENSG00000229619	down	Relapsed vs. Non-relapsed HH patients	James et al. 2019
RP11-384L8.1	ENSG00000261572	down	Relapsed vs. Non-relapsed HH patients	James et al. 2019
CITF22-1A6.3	ENSG00000273192	down	Relapsed vs. Non-relapsed HH patients	James et al. 2019
*Missing Ensembl codes are due to lack of experimental sequence evidence required for code assignment.
Notes:
Bárcenas-López et al.,2020 defined early relapse as the relapse when ≥5% leukemic blasts were noted in a bone marrow sample during the first 36 months after having achieved complete remission (CR)
Bárcenas-López et al.,2020 defined early mortality as the patient’s death during the first 24-months.
James et al. 2019 did not indicated relapse conditions.
